# Supplementary material
Source: PubMed Central journal article supplement (PMC9761066)
Supplement: mmc1.pdf [file mmc1.pdf]

# THE LANCET

## Infectious Diseases

### Supplementary appendix

This appendix formed part of the original submission and has been peer reviewed. We post it as supplied by the authors.

Supplement to: Drozd M, Pujades-Rodriguez M, Lillie PJ, et al. Non-communicable disease, sociodemographic factors, and risk of death from infection: a UK Biobank observational cohort study. *Lancet Infect Dis* 2021; published online March 1. [https://doi.org/10.1016/S1473-3099\(20\)30978-6](https://doi.org/10.1016/S1473-3099(20)30978-6).

## Supplemental Material

Supplemental Table 1: Co-morbidity definitions

| <b>NCD group</b>                                      | <b>UK Biobank self-reported illnesses included</b>                                                                                                                                                                                                        |
|-------------------------------------------------------|-----------------------------------------------------------------------------------------------------------------------------------------------------------------------------------------------------------------------------------------------------------|
| Hypertension                                          | Hypertension<br>Essential hypertension                                                                                                                                                                                                                    |
| Chronic cardiac disease                               | Angina<br>Cardiomyopathy<br>Heart attack/myocardial infarction<br>heart failure/pulmonary oedema<br>Hypertrophic cardiomyopathy<br>Coronary angioplasty (ptca) +/- stent<br>Coronary artery bypass grafts<br>Triple heart bypass                          |
| Chronic respiratory disease                           | Asthma<br>Bronchiectasis<br>Chronic obstructive airways disease/COPD<br>Emphysema<br>Emphysema/chronic bronchitis<br>Fibrosing alveolitis/unspecified alveolitis<br>Interstitial lung disease<br>Other chronic respiratory problems<br>Pulmonary fibrosis |
| Diabetes                                              | Diabetes<br>Diabetic eye disease<br>Diabetic nephropathy<br>Diabetic neuropathy/ulcers<br>Type 1 diabetes<br>Type 2 diabetes                                                                                                                              |
| Cancer                                                | Any cancer diagnosis during lifetime                                                                                                                                                                                                                      |
| Chronic liver disease                                 | Liver failure/cirrhosis<br>Non-infective hepatitis<br>Oesophageal varices<br>Primary biliary cirrhosis                                                                                                                                                    |
| Chronic kidney disease                                | Diabetic nephropathy<br>Immunoglobulin A (IgA) nephropathy<br>Kidney nephropathy<br>Polycystic kidney<br>Renal failure not requiring dialysis<br>Renal failure requiring dialysis<br>Renal/kidney failure                                                 |
| Prior stroke/TIA                                      | Brain haemorrhage<br>Ischaemic stroke<br>Stroke<br>Subarachnoid haemorrhage<br>Transient ischaemic attack (TIA)                                                                                                                                           |
| Other neurology disease                               | Cerebral palsy<br>Epilepsy<br>Motor neurone disease<br>Multiple sclerosis<br>Myasthenia gravis<br>Parkinson's disease                                                                                                                                     |
| Psychiatric disease                                   | Depression<br>Mania/bipolar disorder/manic depression<br>Postnatal depression<br>Schizophrenia                                                                                                                                                            |
| Chronic inflammatory and autoimmune rheumatic disease | Ankylosing spondylitis<br>Dermatomyositis                                                                                                                                                                                                                 |

|                           |                                                                                                                                                                                                                                                                                                          |
|---------------------------|----------------------------------------------------------------------------------------------------------------------------------------------------------------------------------------------------------------------------------------------------------------------------------------------------------|
| (Rheumatological disease) | Dermatopolymyositis<br>Giant cell/temporal arteritis<br>Myositis/myopathy<br>Polymyalgia rheumatica<br>Polymyositis<br>Psoriatic arthropathy<br>Rheumatoid arthritis<br>Sarcoidosis<br>Scleroderma/systemic sclerosis<br>Sjogren's syndrome/sicca syndrome<br>Systemic lupus erythematosus<br>Vasculitis |
|---------------------------|----------------------------------------------------------------------------------------------------------------------------------------------------------------------------------------------------------------------------------------------------------------------------------------------------------|

All comorbidities are defined using self-reported illness at verbal nurse led interview (UK Biobank data fields 20002 and 20004). COPD, chronic obstructive pulmonary disease.

## Supplemental Table 2: ICD-10 infection-death codes

A00.0, A00.1, A00.9, A01.0-A01.4, A02.0-A02.2, A02.8, A02.9, A03.0-A03.3, A03.8, A03.9, A04.0-A04.9, A06.2, A06.4-A06.6, A07.0, A07.8, A07.9, A08.0-A08.4, A09.9, A15.0-A15.9, A16.0-A16.9, A17.0, A17.1, A17.8, A17.9, A18.0-A18.8, A19.0-A19.2, A19.8, A19.9, A20.0-A20.3, A20.7-A20.9, A21.0-A21.3, A21.7-A21.9, A22.0-A22.2, A22.7-A22.9, A23.0-A23.3, A23.8, A23.9, A24.0-A24.4, A25.0, A25.9, A26.7-A26.9, A27.0, A27.8, A27.9, A28.8, A28.9, A30.0-A30.5, A30.8, A30.9, A31.0, A31.1, A31.8, A31.9, A32.0, A32.1, A32.7-A32.9, A33.X, A34.X, A35.X, A36.0-A36.3, A36.8, A36.9, A37.0, A37.1, A37.8, A37.9, A39.0, A39.2-A39.5, A39.8, A39.9, A40.0-A40.3, A40.8, A40.9, A41.0, A41.0-A41.5, A41.8, A41.9, A42.0-A42.2, A42.7-A42.9, A46.X, A48.0, A48.8, A49.0-A49.3, A49.2, A49.8, A49.9, A54.0, A54.2-A54.4, A54.5, A54.6, A54.8, A54.9, A56.4, A57.X, A66.0-A66.4, A66.6-A66.9, A67.0-A67.3, A67.9, A68.0, A68.1, A68.9, A69.1, A70.X, A71.0, A71.1, A71.9, A74.0, A74.8, A74.9, A75.0-A75.3, A75.9, A77.0, A79.0, A79.8, A79.9, A80.9, A81.0, A81.8, A81.9, A82.0, A82.1, A82.9, A83.0, A83.6, A83.8, A83.9, A84.0, A84.8, A84.9, A85.0-A85.2, A85.8, A86.X, A87.0, A87.1, A87.2, A87.8, A87.9, A88.0, A88.8, A89.X, A90.X, A91.X, A92.0, A92.3, A92.8, A92.9, A93.0, A93.8, A94.X, A95.0, A95.1, A95.9, A96.0, A96.8, A96.9, A98.0, A98.3, A98.4, A98.8, A99.X, B00.0, B00.1, B00.2, B00.3-B00.5, B00.7-B00.9, B01.0, B01.1, B01.2, B01.8, B01.9, B02.0, B02.1, B02.2, B02.3, B02.7-B02.9, B03.X, B05.0, B05.1, B05.2, B05.3, B05.4, B05.8, B05.9, B06.0, B06.8, B06.9, B07.X, B08.0, B08.4, B08.5, B08.8, B09.X, B16.0-B16.2, B16.9, B17.0, B17.1, B17.8, B17.9, B18.0-B18.2, B18.8, B18.9, B19.0, B19.9, B25.0, B25.1, B25.2, B25.8, B25.9, B26.0, B26.1, B26.2, B26.3, B26.8, B26.9, B27.0, B27.1, B27.8, B27.9, B30.0-B30.2, B30.3, B30.8, B30.9, B33.0, B33.2-B33.4, B33.8, B34.0-B34.4 (exclude corona), B34.8, B34.9, B35.9, B36.8, B37.0-B37.9, B38.0-B38.4, B38.7-B38.9, B41.0, B41.7-B41.9, B43.1, B43.2, B44.0-B44.2, B44.7-B44.9, B45.0-B45.3, B45.7-B45.9, B46.8, B47.1, B48.7, B48.8, B50.0, B50.8, B50.9, B51.0, B51.8, B51.9, B52.0, B52.8, B52.9, B53.0, B53.1, B53.8, B54.X, B55.0-B55.2, B55.9, B56.0, B56.1, B56.9, B58.0-B58.3, B58.8, B58.9, B60.0, B60.8, B64.X, B65.0-B65.2, B65.8, B65.9, B67.8, B67.9, B71.0, B71.8, B71.9, B76.1, B81.0, B81.4, B81.8, B82.0, B82.9, B83.0, B83.8, B83.9, B85.0-B85.2, B85.4, B87.0-B87.4, B87.8, B87.9, B88.0, B89.X, B91.X, B92.X, B94.0, B94.0, B94.1, B94.2, B94.8, B94.9, B95.0-B95.8, B96.0-B96.2, B96.3, B96.4, B96.5, B96.7, B96.8, B97.0-B97.8, D47.5, D73.3, E32.1, G00.0-G00.3, G00.8, G00.9, G01.X, G02.0, G02.1, G02.8, G03.0-G03.2, G03.8, G03.9, G04.2, G05.0, G05.1, G05.2, G06.0-G06.2, G07X, G14.X, G53.0, G53.1, G63.0, G73.1, G73.4, G93.3, G94.0, H03.0, H06.1, H10.0, H10.2, H10.3, H10.4, H10.5, H10.8, H10.9, H13.0, H13.1, H13.2, H16.1, H16.2, H19.1, H19.2, H19.3, H22.0, H32.0, H60.0, H60.1, H60.2, H60.3, H60.5, H60.8, H60.9, H62.0, H62.1, H62.3, H62.4, H65.0, H65.1, H65.2-H65.4, H65.9, H66.0-H66.4, H66.9, H67.0, H67.1, H67.8, H70.0, H70.1, H70.8, H70.9, H73.0, H73.1, H75.0, H94.0, I32.0, I32.1, I41.0, I41.1, I41.2, I42.3, I43.0, I52.0, I52.1, I68.1, I98.1, J00.X, J01.0-J01.4, J01.8, J01.9, J02.0, J02.8, J02.9, J03.0, J03.0, J03.8, J03.9, J06.0, J06.8, J06.9, J09.X, J10.0, J10.0, J10.1, J10.8, J11.0, J11.1, J11.8, J12.0, J12.1, J12.2, J12.3, J12.8, J12.9, J13X, J14X, J15.0- J15.9, J16.0, J16.8, J17.0, J17.1, J17.2, J17.3, J17.8, J18.0-J18.2, J18.8, J18.9, J20.0, J20.1, J20.2, J20.3, J20.4, J20.5-J20.7, J21.0, J21.1, J22.X, J31.0-J31.2, J32.0-J32.4, J32.8, J32.9, J34.0, J35.0, J36X, J39.0, J39.1, J44.0, J65X, J85.0, J85.1, J85.2, J85.3, K04.6, K04.7, K11.3, K12.2, K23.0, K35.2, K35.3, K35.8, K36.X, K37.X, K51.5, K52. 3, K57.0, K57.1, K57.2, K57.3, K57.4, K57.5, K57.8, K57.9, K61.0-K61.4, K63.0, K65.0, K65.8, K65.9, K67.0-K67.3, K75.0, K77.0, K80.0-K80.5, K81.0, K81.1, K81.9, K83.0, K93.0, L00.X, L02.0-L02.4, L02.8, L02.9, L03.0-L03.3, L03.8, L03.9, L05.0, L05.9, L92.2, L98.3, M00.0-M00.2, M00.8, M01, M01.0, M01.1, M01.3, M01.4, M01.5, M01.6, M02.3, M03.0, M03.1, M35.4, M46.2, M49.0-M49.2, M49.3, M63.0, M63.1, M65.0, M68.0, M71.0, M73.0, M86.0-M86.2, M86.3-M86.6, M86.8, M86.9, M89.6, N08.0, N15.1, N16.0, N22.0, N29.1, N33.0, N34.0, N35.1, N39.0, N41.2, N45.0, N45.9, N73.0, N73.1, N73.2, N73.3, N73.4, N73.5, N74.0, N74.1, N75.1, N76.4, N77.0, N77.1, O26.4, O35.3, O75.3, O98.0, O98.4, O98.5, O98.6, O98.8, O98.9, R57.2

ICD-10 codes adapted from Wu *J et al* (Incidence of infections associated with oral glucocorticoid dose in people diagnosed with polymyalgia rheumatica or giant cell arteritis: a cohort study in England. *CMAJ*; 2019; 191(25): E680-E688) with additional inclusion of codes I33, I38, I39 (for infective endocarditis) and removal of code symptoms (R05, R07.0). A full description of each code is provided on pages 17-43 of this document.

**Supplemental Table 3: Classification of infection deaths**

| <b>Infection classification</b>        | <b>Number (%)</b> |
|----------------------------------------|-------------------|
| Blood stream                           | 81 (5.9%)         |
| Bone, joint and connective tissue      | 5 (0.4%)          |
| Digestive tract, including liver       | 196 (14.2%)       |
| Genitourinary                          | 82 (5.9%)         |
| Heart and circulation                  | 61 (4.4%)         |
| Lower respiratory tract                | 840 (60.6%)       |
| Neurological and eye                   | 59 (4.3%)         |
| Other infections                       | 38 (2.7%)         |
| Skin and soft tissue                   | 20 (1.4%)         |
| Upper respiratory tract, including ENT | 3 (0.2%)          |

Data illustrated Figure 1b. ENT denotes ear, nose and throat.

**Supplemental Table 4: Incidence rate ratios and 95% confidence intervals from unadjusted, age/sex, age/sex/demographic and fully adjusted Poisson models for infection and non-infection death**

| Model                                 | Infection Death<br>IRR (95% CI) |                      |                         |                     | Non-infection Death<br>IRR (95% CI) |                     |                         |                     |
|---------------------------------------|---------------------------------|----------------------|-------------------------|---------------------|-------------------------------------|---------------------|-------------------------|---------------------|
|                                       | Crude                           | Age/Sex              | Age/Sex/<br>Demographic | Full                | Crude                               | Age/Sex             | Age/Sex/<br>Demographic | Full                |
| <b>Age (reference: 45)</b>            |                                 |                      |                         |                     |                                     |                     |                         |                     |
| <b>50</b>                             | 1.68<br>(1.33-2.12)             | 1.69<br>(1.34-2.14)  | 1.75<br>(1.39-2.21)     | 1.64<br>(1.30-2.08) | 1.59<br>(1.52-1.65)                 | 1.60<br>(1.54-1.67) | 1.63<br>(1.57-1.70)     | 1.55<br>(1.49-1.62) |
| <b>55</b>                             | 3.26<br>(2.51-4.23)             | 3.30<br>(2.54-4.28)  | 3.55<br>(2.74-4.61)     | 3.13<br>(2.41-4.07) | 2.42<br>(2.30-2.55)                 | 2.44<br>(2.32-2.58) | 2.53<br>(2.40-2.67)     | 2.29<br>(2.18-2.42) |
| <b>60</b>                             | 5.10<br>(3.95-6.60)             | 5.12<br>(3.96-6.62)  | 5.68<br>(4.39-7.36)     | 4.77<br>(3.68-6.19) | 3.68<br>(3.50-3.87)                 | 3.69<br>(3.51-3.88) | 3.86<br>(3.67-4.06)     | 3.32<br>(3.16-3.49) |
| <b>65</b>                             | 8.43<br>(6.61-10.76)            | 8.32<br>(6.53-10.62) | 9.53<br>(7.46-12.18)    | 7.59<br>(5.92-9.73) | 6.15<br>(5.87-6.45)                 | 6.08<br>(5.80-6.38) | 6.47<br>(6.16-6.79)     | 5.21<br>(4.97-5.48) |
| <b>Sex (reference: female)</b>        |                                 |                      |                         |                     |                                     |                     |                         |                     |
| <b>Male</b>                           | 1.88<br>(1.69-2.10)             | 1.80<br>(1.61-2.00)  | 1.62<br>(1.46-1.81)     | 1.60<br>(1.43-1.79) | 1.79<br>(1.75-1.84)                 | 1.73<br>(1.69-1.77) | 1.61<br>(1.57-1.65)     | 1.61<br>(1.57-1.65) |
| <b>Ethnicity (reference: white)</b>   |                                 |                      |                         |                     |                                     |                     |                         |                     |
| <b>BAME</b>                           | 0.56<br>(0.41-0.76)             | 0.81<br>(0.59-1.11)  | 0.68<br>(0.49-0.93)     | 0.64<br>(0.46-0.87) | 0.64<br>(0.60-0.69)                 | 0.89<br>(0.83-0.95) | 0.82<br>(0.77-0.88)     | 0.80<br>(0.75-0.86) |
| <b>SED Quintile (reference: 1)</b>    |                                 |                      |                         |                     |                                     |                     |                         |                     |
| <b>2</b>                              | 1.22<br>(1.00-1.49)             | 1.22<br>(0.99-1.49)  | 1.19<br>(0.97-1.46)     | 1.17<br>(0.95-1.43) | 1.03<br>(0.98-1.07)                 | 1.02<br>(0.98-1.07) | 1.01<br>(0.97-1.05)     | 1.00<br>(0.96-1.04) |
| <b>3</b>                              | 1.42<br>(1.17-1.73)             | 1.46<br>(1.20-1.78)  | 1.40<br>(1.15-1.70)     | 1.32<br>(1.09-1.61) | 1.09<br>(1.05-1.14)                 | 1.12<br>(1.08-1.17) | 1.09<br>(1.05-1.13)     | 1.06<br>(1.02-1.10) |
| <b>4</b>                              | 1.76<br>(1.46-2.13)             | 1.94<br>(1.61-2.35)  | 1.78<br>(1.47-2.15)     | 1.60<br>(1.33-1.94) | 1.17<br>(1.13-1.22)                 | 1.28<br>(1.23-1.33) | 1.21<br>(1.16-1.25)     | 1.14<br>(1.09-1.19) |
| <b>5</b>                              | 2.85<br>(2.39-3.40)             | 3.31<br>(2.78-3.95)  | 2.74<br>(2.29-3.27)     | 2.13<br>(1.78-2.56) | 1.56<br>(1.51-1.62)                 | 1.79<br>(1.72-1.86) | 1.57<br>(1.52-1.64)     | 1.38<br>(1.33-1.43) |
| <b>Smoking (reference: never)</b>     |                                 |                      |                         |                     |                                     |                     |                         |                     |
| <b>Former</b>                         | 2.12<br>(1.87-2.40)             | 1.63<br>(1.44-1.85)  | 1.54<br>(1.36-1.75)     | 1.38<br>(1.22-1.57) | 1.77<br>(1.72-1.82)                 | 1.40<br>(1.36-1.44) | 1.36<br>(1.32-1.40)     | 1.27<br>(1.24-1.31) |
| <b>Current</b>                        | 4.41<br>(3.83-5.06)             | 4.76<br>(4.14-5.48)  | 3.95<br>(3.42-4.56)     | 3.69<br>(3.19-4.26) | 2.71<br>(2.62-2.81)                 | 2.85<br>(2.76-2.95) | 2.61<br>(2.52-2.70)     | 2.52<br>(2.44-2.61) |
| <b>Obesity (reference: non-obese)</b> |                                 |                      |                         |                     |                                     |                     |                         |                     |
| <b>Class 1</b>                        | 1.30<br>(1.13-1.48)             | 1.20<br>(1.05-1.38)  | 1.15<br>(1.00-1.31)     | 0.95<br>(0.83-1.09) | 1.29<br>(1.25-1.33)                 | 1.20<br>(1.17-1.24) | 1.17<br>(1.14-1.21)     | 1.06<br>(1.03-1.09) |

|                                    |                      |                      |                      |                     |                     |                     |                     |                     |
|------------------------------------|----------------------|----------------------|----------------------|---------------------|---------------------|---------------------|---------------------|---------------------|
| <b>Class 2</b>                     | 1.56<br>(1.26-1.92)  | 1.63<br>(1.32-2.02)  | 1.49<br>(1.21-1.84)  | 1.04<br>(0.84-1.30) | 1.51<br>(1.44-1.59) | 1.57<br>(1.49-1.65) | 1.49<br>(1.42-1.57) | 1.23<br>(1.17-1.29) |
| <b>Class 3</b>                     | 3.37<br>(2.68-4.23)  | 4.31<br>(3.43-5.43)  | 3.79<br>(3.01-4.77)  | 2.21<br>(1.74-2.82) | 1.80<br>(1.68-1.93) | 2.21<br>(2.06-2.37) | 2.06<br>(1.92-2.21) | 1.55<br>(1.44-1.66) |
| <b>Hypertension</b>                | 2.62<br>(2.36-2.91)  | 1.79<br>(1.61-2.00)  | 1.73<br>(1.56-1.93)  | 1.36<br>(1.22-1.53) | 1.93<br>(1.88-1.97) | 1.37<br>(1.34-1.41) | 1.35<br>(1.32-1.38) | 1.15<br>(1.12-1.18) |
| <b>Chronic cardiac disease</b>     | 4.62<br>(4.03-5.29)  | 2.61<br>(2.26-3.00)  | 2.27<br>(1.97-2.61)  | 1.66<br>(1.44-1.92) | 3.26<br>(3.15-3.38) | 1.95<br>(1.88-2.02) | 1.80<br>(1.73-1.87) | 1.54<br>(1.48-1.60) |
| <b>Chronic respiratory disease</b> | 2.61<br>(2.32-2.94)  | 2.68<br>(2.38-3.02)  | 2.49<br>(2.21-2.80)  | 2.21<br>(1.96-2.50) | 1.38<br>(1.33-1.42) | 1.42<br>(1.37-1.46) | 1.36<br>(1.32-1.41) | 1.28<br>(1.24-1.32) |
| <b>Diabetes</b>                    | 3.89<br>(3.38-4.49)  | 2.69<br>(2.33-3.11)  | 2.47<br>(2.13-2.85)  | 1.78<br>(1.52-2.07) | 2.85<br>(2.75-2.95) | 2.05<br>(1.98-2.13) | 1.95<br>(1.88-2.03) | 1.61<br>(1.54-1.67) |
| <b>Cancer</b>                      | 1.70<br>(1.45-1.99)  | 1.33<br>(1.14-1.56)  | 1.31<br>(1.12-1.54)  | 1.30<br>(1.11-1.52) | 2.72<br>(2.64-2.80) | 2.25<br>(2.18-2.32) | 2.23<br>(2.16-2.30) | 2.22<br>(2.16-2.30) |
| <b>Chronic liver disease</b>       | 4.70<br>(2.66-8.29)  | 4.63<br>(2.62-8.17)  | 3.74<br>(2.12-6.60)  | 3.21<br>(1.81-5.67) | 3.02<br>(2.56-3.55) | 2.96<br>(2.52-3.49) | 2.62<br>(2.23-3.09) | 2.37<br>(2.01-2.78) |
| <b>Chronic kidney disease</b>      | 9.02<br>(6.25-13.04) | 7.80<br>(5.40-11.26) | 7.46<br>(5.16-10.78) | 5.04<br>(3.48-7.31) | 3.90<br>(3.43-4.42) | 3.43<br>(3.02-3.89) | 3.35<br>(2.95-3.81) | 2.50<br>(2.20-2.84) |
| <b>Prior stroke/TIA</b>            | 4.79<br>(3.92-5.85)  | 3.07<br>(2.51-3.76)  | 2.61<br>(2.13-3.19)  | 1.87<br>(1.52-2.30) | 3.00<br>(2.83-3.17) | 2.03<br>(1.92-2.15) | 1.85<br>(1.75-1.96) | 1.51<br>(1.43-1.60) |
| <b>Other neurology disease</b>     | 3.27<br>(2.51-4.27)  | 3.30<br>(2.53-4.30)  | 3.09<br>(2.37-4.03)  | 2.84<br>(2.17-3.71) | 2.27<br>(2.12-2.44) | 2.29<br>(2.13-2.46) | 2.21<br>(2.05-2.37) | 2.13<br>(1.98-2.29) |
| <b>Psychiatric disorder</b>        | 1.78<br>(1.50-2.12)  | 2.24<br>(1.88-2.67)  | 1.83<br>(1.54-2.19)  | 1.56<br>(1.30-1.86) | 1.24<br>(1.19-1.30) | 1.51<br>(1.44-1.58) | 1.34<br>(1.28-1.40) | 1.23<br>(1.18-1.29) |
| <b>Rheumatological disease</b>     | 3.31<br>(2.69-4.07)  | 3.02<br>(2.46-3.72)  | 2.83<br>(2.30-3.48)  | 2.45<br>(1.99-3.02) | 1.68<br>(1.58-1.79) | 1.56<br>(1.46-1.66) | 1.50<br>(1.40-1.59) | 1.41<br>(1.32-1.51) |

Demographic refers to ethnicity, SED and smoking status. Fully adjusted refers to age, sex, demographics and all listed non-communicable diseases. BAME – black, Asian and minority ethnicity; CI – confidence interval; IRR – incidence rate ratio; SED – socioeconomic deprivation; TIA – transient ischaemic attack.

**Supplemental Table 5: Incidence rate ratios and 95% confidence intervals from fully adjusted Poisson models for infection and non-infection death with minority ethnic groups considered individually.**

|                                       | <b>Infection death<br/>IRR (95% CI)</b> | <b>Non-infection death<br/>IRR (95% CI)</b> |
|---------------------------------------|-----------------------------------------|---------------------------------------------|
| <b>Age (reference: 45)</b>            |                                         |                                             |
| <b>50</b>                             | 1.64 (1.30-2.08)                        | 1.55 (1.49-1.62)                            |
| <b>55</b>                             | 3.13 (2.41-4.06)                        | 2.29 (2.18-2.42)                            |
| <b>60</b>                             | 4.76 (3.67-6.18)                        | 3.32 (3.16-3.49)                            |
| <b>65</b>                             | 7.58 (5.91-9.72)                        | 5.22 (4.97-5.48)                            |
| <b>Sex (reference: female)</b>        |                                         |                                             |
| <b>Male</b>                           | 1.60 (1.43-1.79)                        | 1.61 (1.57-1.65)                            |
| <b>Ethnicity (reference: white)</b>   |                                         |                                             |
| <b>Mixed</b>                          | 0.58 (0.22-1.55)                        | 0.88 (0.72-1.06)                            |
| <b>Asian</b>                          | 0.74 (0.47-1.17)                        | 0.78 (0.70-0.86)                            |
| <b>Black</b>                          | 0.63 (0.36-1.12)                        | 0.76 (0.67-0.87)                            |
| <b>Chinese</b>                        | 0.47 (0.07-3.32)                        | 0.79 (0.58-1.10)                            |
| <b>Other</b>                          | 0.46 (0.19-1.12)                        | 0.87 (0.74-1.01)                            |
| <b>SED quintile (reference: 1)</b>    |                                         |                                             |
| <b>2</b>                              | 1.17 (0.95-1.43)                        | 1.00 (0.96-1.04)                            |
| <b>3</b>                              | 1.32 (1.09-1.61)                        | 1.06 (1.02-1.10)                            |
| <b>4</b>                              | 1.60 (1.33-1.94)                        | 1.14 (1.10-1.19)                            |
| <b>5</b>                              | 2.13 (1.78-2.56)                        | 1.38 (1.33-1.44)                            |
| <b>Smoking (reference: never)</b>     |                                         |                                             |
| <b>Former</b>                         | 1.38 (1.22-1.57)                        | 1.27 (1.24-1.31)                            |
| <b>Current</b>                        | 3.70 (3.20-4.27)                        | 2.52 (2.43-2.61)                            |
| <b>Obesity (reference: non-obese)</b> |                                         |                                             |
| <b>Class 1</b>                        | 0.95 (0.83-1.09)                        | 1.06 (1.03-1.09)                            |
| <b>Class 2</b>                        | 1.05 (0.84-1.30)                        | 1.23 (1.17-1.29)                            |
| <b>Class 3</b>                        | 2.22 (1.74-2.82)                        | 1.55 (1.44-1.66)                            |
| <b>Hypertension</b>                   | 1.36 (1.22-1.53)                        | 1.15 (1.12-1.18)                            |
| <b>Chronic cardiac disease</b>        | 1.66 (1.44-1.92)                        | 1.54 (1.48-1.60)                            |
| <b>Chronic respiratory disease</b>    | 2.21 (1.96-2.49)                        | 1.28 (1.24-1.32)                            |
| <b>Diabetes</b>                       | 1.77 (1.52-2.07)                        | 1.61 (1.55-1.67)                            |
| <b>Cancer</b>                         | 1.30 (1.11-1.52)                        | 2.22 (2.16-2.29)                            |
| <b>Chronic liver disease</b>          | 3.21 (1.82-5.67)                        | 2.37 (2.01-2.78)                            |
| <b>Chronic kidney disease</b>         | 5.04 (3.48-7.31)                        | 2.50 (2.20-2.84)                            |
| <b>Prior stroke/TIA</b>               | 1.87 (1.52-2.30)                        | 1.51 (1.43-1.60)                            |
| <b>Other neurology disease</b>        | 2.84 (2.18-3.71)                        | 2.13 (1.98-2.29)                            |
| <b>Psychiatric disorder</b>           | 1.56 (1.30-1.86)                        | 1.23 (1.18-1.29)                            |



|                                |                  |                  |
|--------------------------------|------------------|------------------|
| <b>Rheumatological disease</b> | 2.45 (1.99-3.01) | 1.41 (1.32-1.51) |
|--------------------------------|------------------|------------------|

Fully adjusted refers to age, sex, demographics and all listed non-communicable diseases. CI – confidence interval; IRR – incidence rate ratio; SED – socioeconomic deprivation; TIA – transient ischaemic attack.

**Supplemental Table 6: Incidence rate ratios and 95% confidence intervals from fully adjusted Poisson models for lower respiratory tract infection death and other infection death.**

|                                       | <b>LRTI death<br/>IRR (95% CI)</b> | <b>Other infection death<br/>IRR (95% CI)</b> |
|---------------------------------------|------------------------------------|-----------------------------------------------|
| <b>Age (reference: 45)</b>            |                                    |                                               |
| 50                                    | 1.64 (1.20-2.24)                   | 1.64 (1.15-2.33)                              |
| 55                                    | 3.60 (2.55-5.10)                   | 2.55 (1.71-3.79)                              |
| 60                                    | 5.66 (4.00-8.02)                   | 3.73 (2.52-5.52)                              |
| 65                                    | 8.91 (6.39-12.43)                  | 5.99 (4.12-8.73)                              |
| <b>Sex (reference: female)</b>        |                                    |                                               |
| Male                                  | 1.82 (1.57-2.10)                   | 1.33 (1.11-1.58)                              |
| <b>Ethnicity (reference: white)</b>   |                                    |                                               |
| BAME                                  | 0.58 (0.38-0.88)                   | 0.73 (0.45-1.17)                              |
| <b>SED quintile (reference: 1)</b>    |                                    |                                               |
| 2                                     | 1.18 (0.89-1.55)                   | 1.16 (0.86-1.57)                              |
| 3                                     | 1.38 (1.06-1.80)                   | 1.26 (0.94-1.69)                              |
| 4                                     | 1.82 (1.42-2.34)                   | 1.34 (1.00-1.80)                              |
| 5                                     | 2.51 (1.97-3.18)                   | 1.67 (1.26-2.21)                              |
| <b>Smoking (reference: never)</b>     |                                    |                                               |
| Former                                | 1.57 (1.32-1.86)                   | 1.18 (0.97-1.42)                              |
| Current                               | 4.76 (3.95-5.73)                   | 2.43 (1.91-3.09)                              |
| <b>Obesity (reference: non-obese)</b> |                                    |                                               |
| Class 1                               | 0.76 (0.63-0.91)                   | 1.30 (1.06-1.60)                              |
| Class 2                               | 0.91 (0.69-1.21)                   | 1.30 (0.93-1.81)                              |
| Class 3                               | 1.96 (1.44-2.68)                   | 2.69 (1.83-3.94)                              |
| <b>Hypertension</b>                   | 1.34 (1.16-1.55)                   | 1.40 (1.17-1.68)                              |
| <b>Chronic cardiac disease</b>        | 1.55 (1.28-1.86)                   | 1.86 (1.47-2.36)                              |
| <b>Chronic respiratory disease</b>    | 2.89 (2.50-3.35)                   | 1.35 (1.08-1.67)                              |
| <b>Diabetes</b>                       | 1.91 (1.57-2.32)                   | 1.59 (1.24-2.05)                              |
| <b>Cancer</b>                         | 1.13 (0.91-1.40)                   | 1.57 (1.24-2.00)                              |
| <b>Chronic liver disease</b>          | 1.72 (0.64-4.60)                   | 5.75 (2.85-11.59)                             |
| <b>Chronic kidney disease</b>         | 4.43 (2.65-7.40)                   | 6.03 (3.52-10.31)                             |
| <b>Prior stroke/TIA</b>               | 1.87 (1.45-2.41)                   | 1.86 (1.32-2.62)                              |
| <b>Other neurology disease</b>        | 3.49 (2.56-4.76)                   | 1.81 (1.06-3.08)                              |
| <b>Psychiatric disorder</b>           | 1.76 (1.42-2.18)                   | 1.23 (0.90-1.68)                              |
| <b>Rheumatological disease</b>        | 2.22 (1.69-2.93)                   | 2.81 (2.05-3.86)                              |

Fully adjusted refers to age, sex, demographics and all listed non-communicable diseases. BAME – black, Asian and minority ethnicity; CI – confidence interval; IRR – incidence rate ratio; LRTI – lower respiratory tract infection; SED – socioeconomic deprivation; TIA – transient ischaemic attack.

**Supplemental Table 7: Incidence rate ratios and 95% confidence intervals from fully adjusted Poisson models including only events within first 5- or 9-years follow-up.**

| Timepoint                             | Infection death<br>IRR (95% CI) |                  | Non-infection death<br>IRR (95% CI) |                  |
|---------------------------------------|---------------------------------|------------------|-------------------------------------|------------------|
|                                       | 5 years                         | 9 years          | 5 years                             | 9 years          |
| <b>Age (reference: 45)</b>            |                                 |                  |                                     |                  |
| 50                                    | 1.80 (1.11-2.94)                | 1.50 (1.15-1.96) | 1.54 (1.43-1.65)                    | 1.54 (1.47-1.61) |
| 55                                    | 3.57 (2.07-6.15)                | 2.81 (2.08-3.79) | 2.11 (1.93-2.31)                    | 2.23 (2.10-2.37) |
| 60                                    | 4.21 (2.45-7.24)                | 4.25 (3.14-5.76) | 2.72 (2.49-2.97)                    | 3.14 (2.96-3.33) |
| 65                                    | 5.12 (3.02-8.69)                | 6.48 (4.86-8.64) | 4.01 (3.68-4.36)                    | 4.85 (4.58-5.13) |
| <b>Sex (reference: female)</b>        |                                 |                  |                                     |                  |
| Male                                  | 1.56 (1.22-1.99)                | 1.61 (1.40-1.85) | 1.74 (1.66-1.82)                    | 1.64 (1.59-1.69) |
| <b>Ethnicity (reference: white)</b>   |                                 |                  |                                     |                  |
| BAME                                  | 0.59 (0.29-1.20)                | 0.64 (0.44-0.93) | 0.70 (0.62-0.80)                    | 0.82 (0.76-0.89) |
| <b>SED quintile (reference: 1)</b>    |                                 |                  |                                     |                  |
| 2                                     | 1.20 (0.78-1.86)                | 1.22 (0.94-1.57) | 1.01 (0.94-1.09)                    | 1.02 (0.98-1.07) |
| 3                                     | 1.12 (0.72-1.74)                | 1.38 (1.07-1.76) | 1.10 (1.03-1.19)                    | 1.09 (1.04-1.14) |
| 4                                     | 1.72 (1.15-2.59)                | 1.81 (1.43-2.30) | 1.22 (1.14-1.31)                    | 1.17 (1.12-1.23) |
| 5                                     | 2.07 (1.40-3.08)                | 2.25 (1.79-2.83) | 1.48 (1.38-1.58)                    | 1.40 (1.34-1.47) |
| <b>Smoking (reference: never)</b>     |                                 |                  |                                     |                  |
| Former                                | 1.48 (1.13-1.94)                | 1.31 (1.13-1.54) | 1.28 (1.21-1.34)                    | 1.28 (1.24-1.32) |
| Current                               | 2.81 (2.02-3.91)                | 3.39 (2.83-4.04) | 2.48 (2.33-2.64)                    | 2.54 (2.44-2.65) |
| <b>Obesity (reference: non-obese)</b> |                                 |                  |                                     |                  |
| Class 1                               | 0.84 (0.62-1.15)                | 0.85 (0.71-1.01) | 1.03 (0.98-1.09)                    | 1.04 (1.00-1.08) |
| Class 2                               | 0.89 (0.54-1.47)                | 0.96 (0.73-1.26) | 1.18 (1.08-1.30)                    | 1.21 (1.14-1.28) |
| Class 3                               | 1.86 (1.07-3.23)                | 1.92 (1.42-2.60) | 1.46 (1.28-1.66)                    | 1.52 (1.39-1.65) |
| Hypertension                          | 1.45 (1.12-1.86)                | 1.39 (1.21-1.60) | 1.08 (1.02-1.13)                    | 1.15 (1.11-1.19) |
| Chronic cardiac disease               | 1.62 (1.17-2.26)                | 1.66 (1.39-1.99) | 1.69 (1.58-1.80)                    | 1.55 (1.49-1.62) |
| Chronic respiratory disease           | 2.30 (1.77-2.99)                | 2.38 (2.06-2.75) | 1.28 (1.21-1.36)                    | 1.29 (1.24-1.34) |
| Diabetes                              | 1.32 (0.91-1.92)                | 1.82 (1.50-2.19) | 1.65 (1.54-1.77)                    | 1.61 (1.54-1.69) |
| Cancer                                | 1.56 (1.12-2.16)                | 1.32 (1.09-1.60) | 3.52 (3.35-3.70)                    | 2.49 (2.41-2.58) |
| Chronic liver disease                 | 5.04 (1.87-13.57)               | 3.56 (1.84-6.88) | 2.73 (2.10-3.55)                    | 2.51 (2.09-3.02) |
| Chronic kidney disease                | 6.92 (3.53-13.58)               | 6.54 (4.41-9.71) | 2.65 (2.14-3.27)                    | 2.70 (2.34-3.11) |
| Prior stroke/TIA                      | 2.52 (1.67-3.80)                | 2.16 (1.70-2.74) | 1.54 (1.39-1.71)                    | 1.49 (1.40-1.60) |
| Other neurology disease               | 2.93 (1.67-5.13)                | 2.71 (1.95-3.78) | 1.98 (1.74-2.26)                    | 2.06 (1.89-2.24) |
| Psychiatric disorder                  | 1.61 (1.10-2.36)                | 1.57 (1.26-1.94) | 1.24 (1.14-1.34)                    | 1.24 (1.17-1.31) |
| Rheumatological disease               | 1.77 (1.05-2.99)                | 2.28 (1.75-2.97) | 1.40 (1.25-1.57)                    | 1.39 (1.29-1.50) |

Fully adjusted refers to age, sex, demographics and all listed non-communicable diseases. BAME – black, Asian and minority ethnicity; CI – confidence interval; IRR – incidence rate ratio; SED – socioeconomic deprivation; TIA – transient ischaemic attack.

**Supplemental Table 8: Incidence rate ratios and 95% confidence intervals from age-sex adjusted Poisson models using study cohort versus main UK biobank cohort.**

| Cohort                                | Infection Death<br>IRR (95% CI) |                               | Non-infection Death<br>IRR (95% CI) |                               |
|---------------------------------------|---------------------------------|-------------------------------|-------------------------------------|-------------------------------|
|                                       | Study cohort                    | Complete UK<br>Biobank cohort | Study cohort                        | Complete UK<br>Biobank cohort |
| Cohort size                           | 493,295                         | 502,505                       | 493,295                             | 502,505                       |
| Events                                | 1,385                           | 1441                          | 26,344                              | 27,105                        |
| <b>Age (reference: 45)</b>            |                                 |                               |                                     |                               |
| 50                                    | 1.69 (1.34-2.14)                | 1.71 (1.36-2.15)              | 1.60 (1.54-1.67)                    | 1.60 (1.53-1.66)              |
| 55                                    | 3.30 (2.54-4.28)                | 3.28 (2.54-4.22)              | 2.44 (2.32-2.58)                    | 2.44 (2.32-2.57)              |
| 60                                    | 5.12 (3.96-6.62)                | 4.97 (3.87-6.39)              | 3.69 (3.51-3.88)                    | 3.68 (3.51-3.87)              |
| 65                                    | 8.32 (6.53-10.62)               | 8.09 (6.39-10.26)             | 6.08 (5.80-6.38)                    | 6.05 (5.77-6.33)              |
| <b>Sex (reference: female)</b>        |                                 |                               |                                     |                               |
| Male                                  | 1.80 (1.61-2.00)                | 1.78 (1.60-1.98)              | 1.73 (1.69-1.77)                    | 1.72 (1.68-1.77)              |
| <b>Ethnicity (reference: white)</b>   |                                 |                               |                                     |                               |
| BAME                                  | 0.81 (0.59-1.11)                | 0.86 (0.65-1.13)              | 0.89 (0.83-0.95)                    | 0.94 (0.89-1.00)              |
| <b>SED quintile (reference: 1)</b>    |                                 |                               |                                     |                               |
| 2                                     | 1.22 (0.99-1.49)                | 1.26 (1.03-1.54)              | 1.02 (0.98-1.07)                    | 1.03 (0.99-1.08)              |
| 3                                     | 1.46 (1.20-1.78)                | 1.54 (1.27-1.87)              | 1.12 (1.08-1.17)                    | 1.12 (1.08-1.17)              |
| 4                                     | 1.94 (1.61-2.35)                | 1.98 (1.64-2.39)              | 1.28 (1.23-1.33)                    | 1.29 (1.24-1.34)              |
| 5                                     | 3.31 (2.78-3.95)                | 3.49 (2.94-4.16)              | 1.79 (1.72-1.86)                    | 1.81 (1.74-1.88)              |
| <b>Smoking (reference: never)</b>     |                                 |                               |                                     |                               |
| Former                                | 1.63 (1.44-1.85)                | 1.64 (1.45-1.86)              | 1.40 (1.36-1.44)                    | 1.40 (1.36-1.44)              |
| Current                               | 4.76 (4.14-5.48)                | 4.75 (4.14-5.46)              | 2.85 (2.76-2.95)                    | 2.86 (2.76-2.95)              |
| <b>Obesity (reference: non-obese)</b> |                                 |                               |                                     |                               |
| Class 1                               | 1.20 (1.05-1.38)                | 1.2 (1.05-1.37)               | 1.20 (1.17-1.24)                    | 1.20 (1.17-1.24)              |
| Class 2                               | 1.63 (1.32-2.02)                | 1.65 (1.34-2.03)              | 1.57 (1.49-1.65)                    | 1.58 (1.50-1.65)              |
| Class 3                               | 4.31 (3.43-5.43)                | 4.34 (3.46-5.44)              | 2.21 (2.06-2.37)                    | 2.22 (2.07-2.38)              |
| Hypertension                          | 1.79 (1.61-2.00)                | 1.81 (1.63-2.01)              | 1.37 (1.34-1.41)                    | 1.38 (1.35-1.42)              |
| Chronic cardiac disease               | 2.61 (2.26-3.00)                | 2.66 (2.32-3.06)              | 1.95 (1.88-2.02)                    | 1.96 (1.89-2.03)              |
| Chronic respiratory disease           | 2.68 (2.38-3.02)                | 2.72 (2.43-3.06)              | 1.42 (1.37-1.46)                    | 1.42 (1.38-1.47)              |
| Diabetes                              | 2.69 (2.33-3.11)                | 2.73 (2.37-3.14)              | 2.05 (1.98-2.13)                    | 2.07 (1.99-2.14)              |
| Cancer                                | 1.33 (1.14-1.56)                | 1.34 (1.14-1.56)              | 2.25 (2.18-2.32)                    | 2.24 (2.17-2.31)              |
| Chronic liver disease                 | 4.63 (2.62-8.17)                | 4.47 (2.53-7.89)              | 2.96 (2.52-3.49)                    | 2.95 (2.51-3.47)              |
| Chronic kidney disease                | 7.80 (5.40-11.26)               | 7.74 (5.39-11.11)             | 3.43 (3.02-3.89)                    | 3.52 (3.11-3.98)              |
| Prior stroke/TIA                      | 3.07 (2.51-3.76)                | 3.24 (2.67-3.92)              | 2.03 (1.92-2.15)                    | 2.06 (1.95-2.17)              |
| Other neurology disease               | 3.30 (2.53-4.30)                | 3.46 (2.69-4.44)              | 2.29 (2.13-2.46)                    | 2.44 (2.28-2.61)              |
| Psychiatric disorder                  | 2.24 (1.88-2.67)                | 2.34 (1.98-2.77)              | 1.51 (1.44-1.58)                    | 1.51 (1.45-1.58)              |

|                                |                  |                  |                  |                  |
|--------------------------------|------------------|------------------|------------------|------------------|
| <b>Rheumatological disease</b> | 3.02 (2.46-3.72) | 3.00 (2.45-3.68) | 1.56 (1.46-1.66) | 1.58 (1.48-1.68) |
|--------------------------------|------------------|------------------|------------------|------------------|

BAME – black, Asian and minority ethnicity; CI – confidence interval; IRR – incidence rate ratio; SED – socioeconomic deprivation; TIA – transient ischaemic attack.

**Supplemental Table 9: Incidence rate ratios and 95% confidence intervals from unadjusted, age/sex and age/sex/demographic adjusted Poisson models for infection and non-infection death considering non-communicable disease defined as number of co-morbidities.**

| Model                                  | Infection Death<br>IRR (95% CI) |                    |                         | Non-infection Death<br>IRR (95% CI) |                  |                         |
|----------------------------------------|---------------------------------|--------------------|-------------------------|-------------------------------------|------------------|-------------------------|
|                                        | Crude                           | Age/Sex            | Age/Sex/<br>Demographic | Crude                               | Age/Sex          | Age/Sex/<br>Demographic |
| <b>Comorbidities (reference: none)</b> |                                 |                    |                         |                                     |                  |                         |
| <b>1</b>                               | 2.09 (1.77-2.46)                | 1.76 (1.49-2.08)   | 1.70 (1.44-2.00)        | 1.72 (1.67-1.78)                    | 1.48 (1.43-1.53) | 1.45 (1.41-1.50)        |
| <b>2</b>                               | 4.41 (3.74-5.19)                | 3.26 (2.76-3.85)   | 3.01 (2.55-3.56)        | 2.67 (2.58-2.77)                    | 2.04 (1.97-2.11) | 1.96 (1.89-2.03)        |
| <b>3</b>                               | 7.84 (6.55-9.39)                | 5.33 (4.44-6.39)   | 4.71 (3.92-5.65)        | 3.93 (3.77-4.10)                    | 2.78 (2.67-2.90) | 2.61 (2.50-2.72)        |
| <b>4</b>                               | 13.43 (10.77-16.73)             | 8.53 (6.83-10.65)  | 7.05 (5.63-8.82)        | 6.11 (5.78-6.46)                    | 4.08 (3.86-4.32) | 3.68 (3.47-3.89)        |
| <b>5+</b>                              | 19.86 (14.58-27.05)             | 12.59 (9.23-17.17) | 9.53 (6.97-13.03)       | 9.19 (8.46-9.98)                    | 6.12 (5.63-6.64) | 5.26 (4.84-5.72)        |

Demographic refers to ethnicity, SED and smoking status. IRR – incidence rate ratio.

**Supplemental Table 10: Prevalence of NCDs in UKB versus a representative sample of the UK population**

|                             | Men             |     |                 |      | Women           |     |                 |     |
|-----------------------------|-----------------|-----|-----------------|------|-----------------|-----|-----------------|-----|
|                             | Age 45–54 Years |     | Age 55–64 Years |      | Age 45–54 Years |     | Age 55–64 Years |     |
|                             | UK Biobank      | HSE | UK Biobank      | HSE  | UK Biobank      | HSE | UK Biobank      | HSE |
| Chronic cardiac disease     | 6.3             | 8.1 | 17.7            | 24.9 | 1.9             | 3.2 | 5.6             | 8.3 |
| Stroke                      | 0.8             | 1.2 | 1.9             | 3    | 0.6             | 0.9 | 1               | 2.3 |
| Hypertension                | 21.2            | 27  | 34.4            | 39   | 15.4            | 16  | 27.4            | 29  |
| Diabetes                    | 4.5             | 8.1 | 7.8             | 10.5 | 2.4             | 3.5 | 6.3             | 8   |
| Chronic kidney disease      | 0.2             | 1.1 | 0.3             | 1.5  | 0.2             | 1.2 | 0.2             | 1.9 |
| Chronic respiratory disease | 11.8            | 13  | 10.3            | 16   | 13.1            | 16  | 12.2            | 17  |

Adapted from Fry et al (Am J Epidemiol 2017; 186(9): 1026–1034). Chronic cardiac disease data were derived by summing ischaemic heart disease, angina and myocardial infarction. Chronic respiratory disease was derived by summing Asthma and COPD. Data represent % of study population with self-reported disease. HSE – Health Survey for England.

**Supplemental Figure 1: Association of age with infection death or non-infection death using Poisson regression and age modelled using restricted cubic splines.**

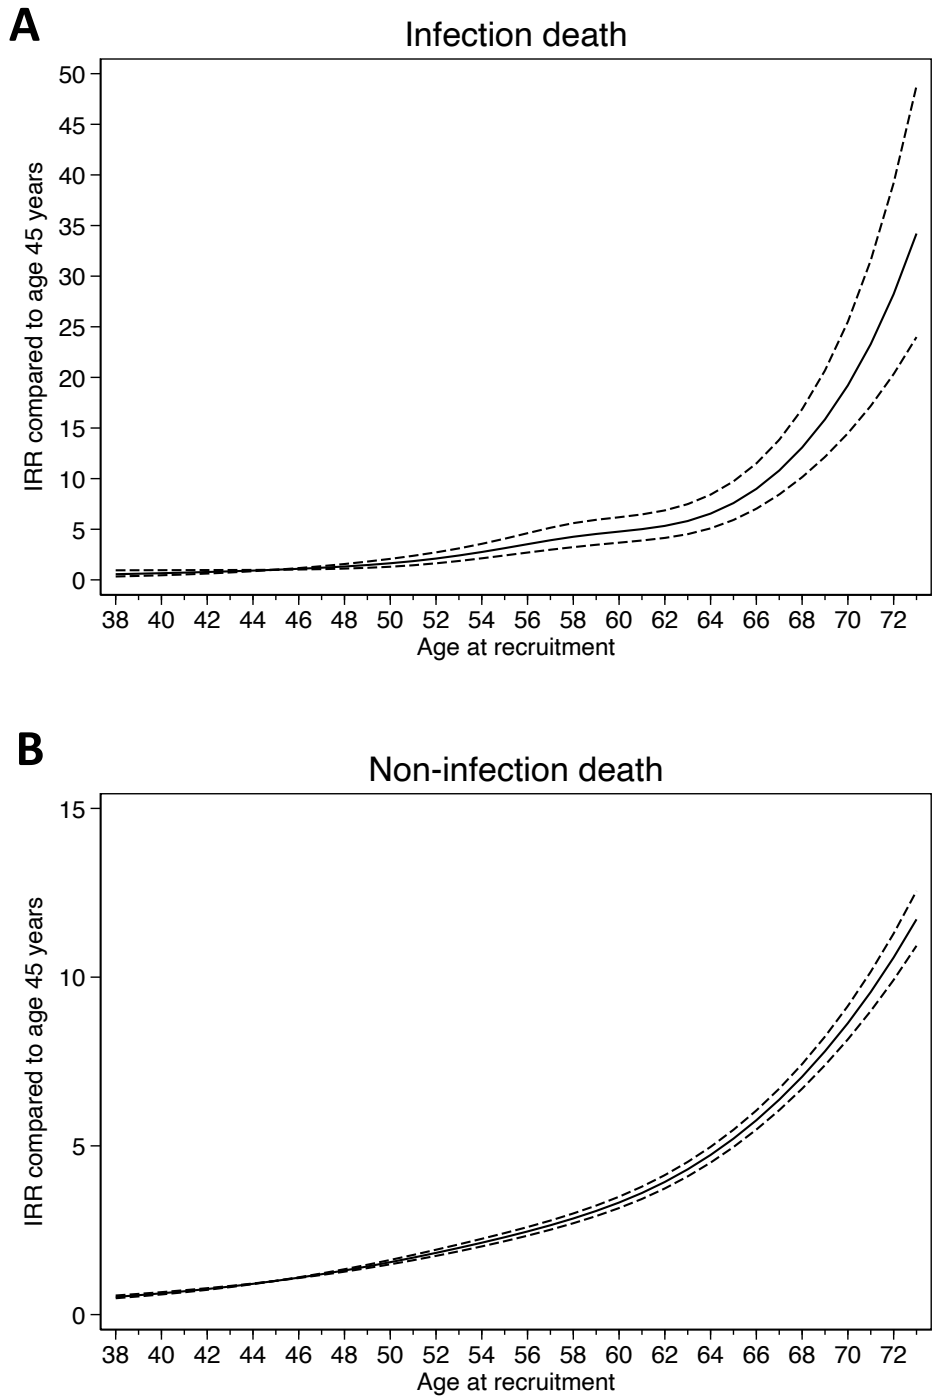

Incidence rate ratios (IRR) for infection death (panel A) or non-infection death (panel B) using Poisson regression (fully adjusted models) and age modelled using restricted cubic splines (5 knots for infection death and 4 knots for non-infection death)



**Supplemental Figure 2: Timing of infection and non-infection deaths during follow-up.**

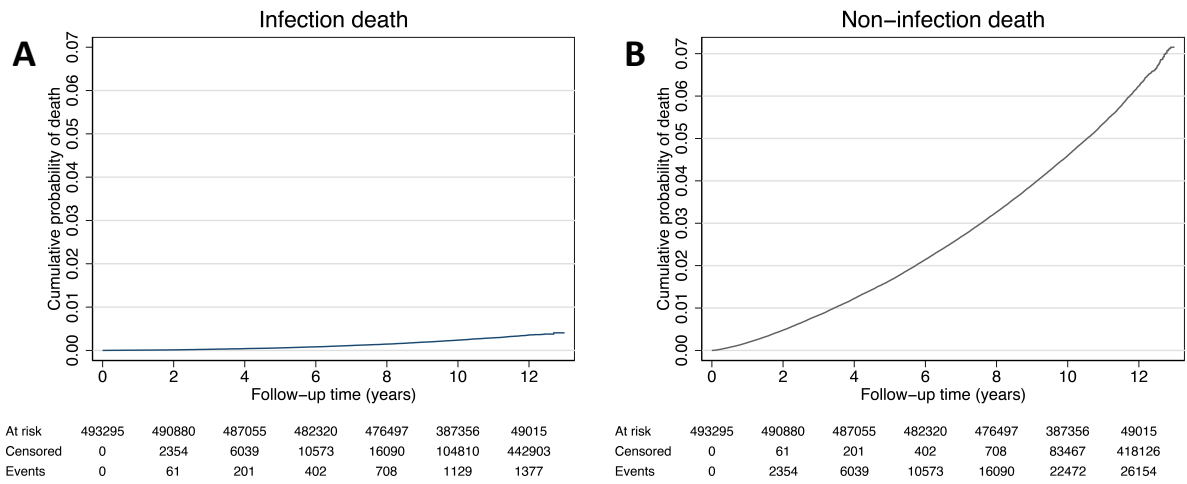

Kaplan-Meier mortality curves illustrating the cumulative probability of infection (A) or non-infection (B) death during follow-up.

**Appendix A: Description of ICD10 codes in Supplemental Table 2**

| <b>ICD10 code</b> | <b>Description</b>                                        |
|-------------------|-----------------------------------------------------------|
| A00.0             | Cholera due to <i>Vibrio cholerae</i> 01, biovar cholerae |
| A00.1             | Cholera due to <i>Vibrio cholerae</i> 01, biovar el tor   |
| A00.9             | Cholera, unspecified                                      |
| A01.0             | Typhoid fever                                             |
| A01.1             | Paratyphoid fever A                                       |
| A01.2             | Paratyphoid fever B                                       |
| A01.3             | Paratyphoid fever C                                       |
| A01.4             | Paratyphoid fever, unspecified                            |
| A02.0             | Salmonella gastro-enteritis                               |
| A02.1             | Salmonella septicaemia                                    |
| A02.2             | Localised Salmonella infections                           |
| A02.8             | Other specified Salmonella infections                     |
| A02.9             | Salmonella infection, unspecified                         |
| A03.0             | Shigellosis due to <i>Shigella dysenteriae</i>            |
| A03.1             | Shigellosis due to <i>Shigella flexneri</i>               |
| A03.2             | Shigellosis due to <i>Shigella boydii</i>                 |
| A03.3             | Shigellosis due to <i>Shigella sonnei</i>                 |
| A03.8             | Other shigellosis                                         |
| A03.9             | Shigellosis, unspecified                                  |
| A04.0             | Enteropathogenic <i>Escherichia coli</i> infection        |
| A04.1             | Enterotoxigenic <i>Escherichia coli</i> infection         |
| A04.2             | Enteroinvasive <i>Escherichia coli</i> infection          |
| A04.3             | Enterohaemorrhagic <i>Escherichia coli</i> infection      |
| A04.4             | Other intestinal <i>Escherichia coli</i> infections       |
| A04.5             | <i>Campylobacter</i> enteritis                            |
| A04.6             | Enteritis due to <i>Yersinia enterocolitica</i>           |
| A04.7             | Enterocolitis due to <i>Clostridium difficile</i>         |
| A04.8             | Other specified bacterial intestinal infections           |
| A04.9             | Bacterial intestinal infection, unspecified               |
| A06.2             | Amoebic nondysenteric colitis                             |
| A06.4             | Amoebic liver abscess                                     |
| A06.5             | Amoebic lung abscess                                      |
| A06.6             | Amoebic brain abscess                                     |
| A07.0             | Balantidiasis                                             |
| A07.8             | Other specified protozoal intestinal diseases             |
| A07.9             | Protozoal intestinal disease, unspecified                 |
| A08.0             | Rotaviral enteritis                                       |
| A08.1             | Acute gastro-enteropathy due to Norwalk agent             |
| A08.2             | Adenoviral enteritis                                      |
| A08.3             | Other viral enteritis                                     |

A08.4 Viral intestinal infection, unspecified

A09.9 Gastroenteritis and colitis of unspecified origin

A15.0 Tuberculosis of lung, confirmed by sputum microscopy with or without culture

A15.1 Tuberculosis of lung, confirmed by culture only

A15.2 Tuberculosis of lung, confirmed histologically

A15.3 Tuberculosis of lung, confirmed by unspecified means

A15.4 Tuberculosis of intrathoracic lymph nodes, confirmed bacteriologically and histologically

A15.5 Tuberculosis of larynx, trachea and bronchus, confirmed bacteriologically and histologically

A15.6 Tuberculous pleurisy, confirmed bacteriologically and histologically

A15.7 Primary respiratory tuberculosis, confirmed bacteriologically and histologically

A15.8 Other respiratory tuberculosis, confirmed bacteriologically and histologically

A15.9 Respiratory tuberculosis unspecified, confirmed bacteriologically and histologically

A16 Respiratory tuberculosis, not confirmed bacteriologically or histologically

A16.0 Tuberculosis of lung, bacteriologically and histologically negative

A16.1 Tuberculosis of lung, bacteriological and histological examination not done

A16.2 Tuberculosis of lung, without mention of bacteriological or histological confirmation

A16.3 Tuberculosis of intrathoracic lymph nodes, without mention of bacteriological or histological confirmation

A16.4 Tuberculosis of larynx, trachea and bronchus, without mention of bacteriological or histological confirmation

A16.5 Tuberculous pleurisy, without mention of bacteriological or histological confirmation

A16.6 Primary respiratory tuberculosis without mention of bacteriological or histological confirmation

A16.7 Other respiratory tuberculosis, without mention of bacteriological or histological confirmation

A16.8 Respiratory tuberculosis unspecified, without mention of bacteriological or histological confirmation

A16.9 Tuberculosis of nervous system

A17 Tuberculous meningitis

A17.0 Meningeal tuberculoma

A17.1 Other tuberculosis of nervous system

A17.8 Tuberculosis of nervous system, unspecified

A18 Tuberculosis of other organs

A18.0 Tuberculosis of bones and joints

A18.1 Tuberculosis of genito-urinary system

A18.2 Tuberculous peripheral lymphadenopathy

A18.3 Tuberculosis of intestines, peritoneum and mesenteric glands

A18.4 Tuberculosis of skin and subcutaneous tissue

A18.5 Tuberculosis of eye

A18.6 Tuberculosis of ear

A18.7 Tuberculosis of adrenal glands

A19 Miliary tuberculosis

A19.0 Acute miliary tuberculosis of a single specified site

A19.1 Acute miliary tuberculosis of multiple sites

A19.2 Acute miliary tuberculosis, unspecified

A19.8 Other miliary tuberculosis

|       |                                               |
|-------|-----------------------------------------------|
| A19.9 | Miliary tuberculosis, unspecified             |
| A20   | Plague                                        |
| A20.0 | Bubonic plague                                |
| A20.1 | Cellulocutaneous plague                       |
| A20.2 | Pneumonic plague                              |
| A20.3 | Plague meningitis                             |
| A20.7 | Septicaemic plague                            |
| A20.8 | Other forms of plague                         |
| A20.9 | Plague, unspecified                           |
| A21.0 | Ulceroglandular tularaemia                    |
| A21.1 | Oculoglandular tularaemia                     |
| A21.2 | Pulmonary tularaemia                          |
| A21.3 | Gastro-intestinal tularaemia                  |
| A21.7 | Generalised tularaemia                        |
| A21.8 | Other forms of tularaemia                     |
| A21.9 | Tularaemia, unspecified                       |
| A22   | Anthrax                                       |
| A22.0 | Cutaneous anthrax                             |
| A22.1 | Pulmonary anthrax                             |
| A22.2 | Gastro-intestinal anthrax                     |
| A22.7 | Anthrax septicaemia                           |
| A22.8 | Other forms of anthrax                        |
| A22.9 | Anthrax, unspecified                          |
| A23.0 | Brucellosis due to <i>Brucella melitensis</i> |
| A23.1 | Brucellosis due to <i>Brucella abortus</i>    |
| A23.2 | Brucellosis due to <i>Brucella suis</i>       |
| A23.3 | Brucellosis due to <i>Brucella canis</i>      |
| A23.8 | Other brucellosis                             |
| A23.9 | Brucellosis, unspecified                      |
| A24.0 | Glanders                                      |
| A24.1 | Acute and fulminating melioidosis             |
| A24.2 | Subacute and chronic melioidosis              |
| A24.3 | Other melioidosis                             |
| A24.4 | Melioidosis, unspecified                      |
| A25.0 | Spirillosis                                   |
| A25.1 | Streptobacillosis                             |
| A25.9 | Rat-bite fever, unspecified                   |
| A26.7 | Erysipelothrix septicaemia                    |
| A26.8 | Other forms of erysipeloid                    |
| A26.9 | Erysipeloid, unspecified                      |
| A27.0 | Leptospirosis icterohaemorrhagica             |
| A27.8 | Other forms of leptospirosis                  |
| A27.9 | Leptospirosis, unspecified                    |

A28.8 Other specified zoonotic bacterial diseases, not elsewhere classified  
A28.9 Zoonotic bacterial disease, unspecified  
A30.0 Indeterminate leprosy  
A30.1 Tuberculoid leprosy  
A30.2 Borderline tuberculoid leprosy  
A30.3 Borderline leprosy  
A30.4 Borderline lepromatous leprosy  
A30.5 Lepromatous leprosy  
A30.8 Other forms of leprosy  
A30.9 Leprosy, unspecified  
A31.0 Pulmonary mycobacterial infection  
A31.1 Cutaneous mycobacterial infection  
A31.8 Other mycobacterial infections  
A31.9 Mycobacterial infection, unspecified  
A32.0 Cutaneous listeriosis  
A32.1 Listerial meningitis and meningoencephalitis  
A32.7 Listerial septicaemia  
A32.8 Other forms of listeriosis  
A32.9 Listeriosis, unspecified  
A33 Tetanus neonatorum  
A34 Obstetrical tetanus  
A35 Other tetanus  
A36.0 Pharyngeal diphtheria  
A36.1 Nasopharyngeal diphtheria  
A36.2 Laryngeal diphtheria  
A36.3 Cutaneous diphtheria  
A36.8 Other diphtheria  
A36.9 Diphtheria, unspecified  
A37.0 Whooping cough due to *Bordetella pertussis*  
A37.1 Whooping cough due to *Bordetella parapertussis*  
A37.8 Whooping cough due to other *Bordetella* species  
A37.9 Whooping cough, unspecified  
A39 Meningococcal infection  
A39.0 Meningococcal meningitis  
A39.2 Acute meningococcaemia  
A39.3 Chronic meningococcaemia  
A39.4 Meningococcaemia, unspecified  
A39.5 Meningococcal heart disease  
A39.8 Other meningococcal infections  
A39.9 Meningococcal infection, unspecified  
A40.0 Septicaemia due to streptococcus, group A  
A40.1 Septicaemia due to streptococcus, group B  
A40.2 Septicaemia due to streptococcus, group D

A40.3 Septicaemia due to *Streptococcus pneumoniae*  
 A40.8 Other streptococcal septicaemia  
 A40.9 Streptococcal septicaemia, unspecified  
 A41.0 Septicaemia due to *Staphylococcus aureus*  
 A41.1 Septicaemia due to other specified staphylococcus  
 A41.2 Septicaemia due to unspecified staphylococcus  
 A41.3 Septicaemia due to *Haemophilus influenzae*  
 A41.4 Septicaemia due to anaerobes  
 A41.5 Septicaemia due to other Gram-negative organisms  
 A41.8 Other specified septicaemia  
 A41.9 Septicaemia, unspecified  
 A42.0 Pulmonary actinomycosis  
 A42.1 Abdominal actinomycosis  
 A42.2 Cervicofacial actinomycosis  
 A42.7 Actinomycotic septicaemia  
 A42.8 Other forms of actinomycosis  
 A42.9 Actinomycosis, unspecified  
 A46 Erysipelas  
 A48.0 Gas gangrene  
 A48.8 Other specified bacterial diseases  
 A49.0 Staphylococcal infection, unspecified  
 A49.1 Streptococcal infection, unspecified  
 A49.2 *Haemophilus influenzae* infection, unspecified  
 A49.3 *Mycoplasma* infection, unspecified  
 A49.8 Other bacterial infections of unspecified site  
 A49.9 Bacterial infection, unspecified  
 A54.0 Gonococcal infection of lower genito-urinary tract without periurethral or accessory gland abscess  
 A54.2 Gonococcal pelviperitonitis and other gonococcal genito-urinary infections  
 A54.3 Gonococcal infection of eye  
 A54.4 Gonococcal infection of musculoskeletal system  
 A54.5 Gonococcal pharyngitis  
 A54.6 Gonococcal infection of anus and rectum  
 A54.8 Other gonococcal infections  
 A54.9 Gonococcal infection, unspecified  
 A56.4 Chlamydial infection of pharynx  
 A57 Chancroid  
 A66.0 Initial lesions of yaws  
 A66.1 Multiple papillomata and wet crab yaws  
 A66.2 Other early skin lesions of yaws  
 A66.3 Hyperkeratosis of yaws  
 A66.4 Gummata and ulcers of yaws  
 A66.6 Bone and joint lesions of yaws  
 A66.7 Other manifestations of yaws

A66.8 Latent yaws  
 A66.9 Yaws, unspecified  
 A67.0 Primary lesions of pinta  
 A67.1 Intermediate lesions of pinta  
 A67.2 Late lesions of pinta  
 A67.3 Mixed lesions of pinta  
 A67.9 Pinta, unspecified  
 A68.0 Louse-borne relapsing fever  
 A68.1 Tick-borne relapsing fever  
 A68.9 Relapsing fever, unspecified  
 A69.1 Other Vincent's infections  
 A70 Chlamydia psittaci infection  
 A71 Trachoma  
 A71.0 Initial stage of trachoma  
 A71.1 Active stage of trachoma  
 A71.9 Trachoma, unspecified  
 A74.0 Chlamydial conjunctivitis  
 A74.8 Other chlamydial diseases  
 A74.9 Chlamydial infection, unspecified  
 A75.0 Epidemic louse-borne typhus fever due to *Rickettsia prowazekii*  
 A75.1 Recrudescence typhus [Brill's disease]  
 A75.2 Typhus fever due to *Rickettsia typhi*  
 A75.3 Typhus fever due to *Rickettsia tsutsugamushi*  
 A75.9 Typhus fever, unspecified  
 A77.0 Spotted fever due to *Rickettsia rickettsii*  
 A79.0 Trench fever  
 A79.8 Other specified rickettsioses  
 A79.9 Rickettsiosis, unspecified  
 A80.9 Acute poliomyelitis, unspecified  
 A81.0 Creutzfeldt-Jakob disease  
 A81.8 Other atypical virus infections of central nervous system  
 A81.9 Atypical virus infection of central nervous system, unspecified  
 A82.0 Sylvatic rabies  
 A82.1 Urban rabies  
 A82.9 Rabies, unspecified  
 A83.0 Japanese encephalitis  
 A83.6 Rocio virus disease  
 A83.8 Other mosquito-borne viral encephalitis  
 A83.9 Mosquito-borne viral encephalitis, unspecified  
 A84.0 Far Eastern tick-borne encephalitis [Russian spring-summer encephalitis]  
 A84.8 Other tick-borne viral encephalitis  
 A84.9 Tick-borne viral encephalitis, unspecified  
 A85.0 Enteroviral encephalitis

A85.1 Adenoviral encephalitis  
 A85.2 Arthropod-borne viral encephalitis, unspecified  
 A85.8 Other specified viral encephalitis  
 A86 Unspecified viral encephalitis  
 A87.0 Enteroviral meningitis  
 A87.1 Adenoviral meningitis  
 A87.2 Lymphocytic choriomeningitis  
 A87.8 Other viral meningitis  
 A87.9 Viral meningitis, unspecified  
 A88.0 Enteroviral exanthematous fever [Boston exanthem]  
 A88.8 Other specified viral infections of central nervous system  
 A89 Unspecified viral infection of central nervous system  
 A90 Dengue fever [classical dengue]  
 A91 Dengue haemorrhagic fever  
 A92.0 Chikungunya virus disease  
 A92.3 West Nile fever  
 A92.8 Other specified mosquito-borne viral fevers  
 A92.9 Mosquito-borne viral fever, unspecified  
 A93.0 Oropouche virus disease  
 A93.8 Other specified arthropod-borne viral fevers  
 A94 Unspecified arthropod-borne viral fever  
 A95.0 Sylvatic yellow fever  
 A95.1 Urban yellow fever  
 A95.9 Yellow fever, unspecified  
 A96.0 Junin haemorrhagic fever  
 A96.8 Other arenaviral haemorrhagic fevers  
 A96.9 Arenaviral haemorrhagic fever, unspecified  
 A98.0 Crimean-Congo haemorrhagic fever  
 A98.3 Marburg virus disease  
 A98.4 Ebola virus disease  
 A98.8 Other specified viral haemorrhagic fevers  
 A99 Unspecified viral haemorrhagic fever  
 B00.0 Eczema herpeticum  
 B00.1 Herpesviral vesicular dermatitis  
 B00.2 Herpesviral gingivostomatitis and pharyngotonsillitis  
 B00.3 Herpesviral meningitis  
 B00.4 Herpesviral encephalitis  
 B00.5 Herpesviral ocular disease  
 B00.7 Disseminated herpesviral disease  
 B00.8 Other forms of herpesviral infection  
 B00.9 Herpesviral infection, unspecified  
 B01.0 Varicella meningitis  
 B01.1 Varicella encephalitis



B01.2 Varicella pneumonia  
 B01.8 Varicella with other complications  
 B01.9 Varicella without complications  
 B02.0 Zoster encephalitis  
 B02.1 Zoster meningitis  
 B02.2 Zoster with other nervous system involvement  
 B02.3 Zoster ocular disease  
 B02.7 Disseminated zoster  
 B02.8 Zoster with other complications  
 B02.9 Zoster without complication  
 B03 Smallpox  
 B05.0 Measles complicated by encephalitis  
 B05.1 Measles complicated by meningitis  
 B05.2 Measles complicated by pneumonia  
 B05.3 Measles complicated by otitis media  
 B05.4 Measles with intestinal complications  
 B05.8 Measles with other complications  
 B05.9 Measles without complication  
 B06.0 Rubella with neurological complications  
 B06.8 Rubella with other complications  
 B06.9 Rubella without complication  
 B07 Viral warts  
 B08.0 Other orthopoxvirus infections  
 B08.4 Enteroviral vesicular stomatitis with exanthem  
 B08.5 Enteroviral vesicular pharyngitis  
 B08.8 Other specified viral infections characterised by skin and mucous membrane lesions  
 B09 Unspecified viral infection characterised by skin and mucous membrane lesions  
 B16.0 Acute hepatitis B with delta-agent (coinfection) with hepatic coma  
 B16.1 Acute hepatitis B with delta-agent (coinfection) without hepatic coma  
 B16.2 Acute hepatitis B without delta-agent with hepatic coma  
 B16.9 Acute hepatitis B without delta-agent and without hepatic coma  
 B17.0 Acute delta-(super) infection of hepatitis B carrier  
 B17.1 Acute hepatitis C  
 B17.8 Other specified acute viral hepatitis  
 B17.9 Acute viral hepatitis, unspecified  
 B18.0 Chronic viral hepatitis B with delta-agent  
 B18.1 Chronic viral hepatitis B without delta-agent  
 B18.2 Chronic viral hepatitis C  
 B18.8 Other chronic viral hepatitis  
 B18.9 Chronic viral hepatitis, unspecified  
 B19.0 Unspecified viral hepatitis with coma  
 B19.9 Unspecified viral hepatitis without coma  
 B25.0 Cytomegaloviral pneumonitis

B25.1 Cytomegaloviral hepatitis  
 B25.2 Cytomegaloviral pancreatitis  
 B25.8 Other cytomegaloviral diseases  
 B25.9 Cytomegaloviral disease, unspecified  
 B26.0 Mumps orchitis  
 B26.1 Mumps meningitis  
 B26.2 Mumps encephalitis  
 B26.3 Mumps pancreatitis  
 B26.8 Mumps with other complications  
 B26.9 Mumps without complication  
 B27.0 Gammaherpesviral mononucleosis  
 B27.1 Cytomegaloviral mononucleosis  
 B27.8 Other infectious mononucleosis  
 B27.9 Infectious mononucleosis, unspecified  
 B30.0 Keratoconjunctivitis due to adenovirus  
 B30.1 Conjunctivitis due to adenovirus  
 B30.2 Viral pharyngoconjunctivitis  
 B30.3 Acute epidemic haemorrhagic conjunctivitis (enteroviral)  
 B30.8 Other viral conjunctivitis  
 B30.9 Viral conjunctivitis, unspecified  
 B33.0 Epidemic myalgia  
 B33.2 Viral carditis  
 B33.3 Retrovirus infections, not elsewhere classified  
 B33.4 Hantavirus (cardio-)pulmonary syndrome [HPS] [HCPS]  
 B33.8 Other specified viral diseases  
 B34.0 Adenovirus infection, unspecified  
 B34.1 Enterovirus infection, unspecified  
 B34.3 Parvovirus infection, unspecified  
 B34.4 Papovirus infection, unspecified  
 B34.8 Other viral infections of unspecified site  
 B34.9 Viral infection, unspecified  
 B35.9 Dermatophytosis, unspecified  
 B36.8 Other specified superficial mycoses  
 B37.0 Candidal stomatitis  
 B37.1 Pulmonary candidiasis  
 B37.2 Candidiasis of skin and nail  
 B37.3 Candidiasis of vulva and vagina  
 B37.4 Candidiasis of other urogenital sites  
 B37.5 Candidal meningitis  
 B37.6 Candidal endocarditis  
 B37.7 Candidal septicaemia  
 B37.8 Candidiasis of other sites  
 B37.9 Candidiasis, unspecified

B38.0 Acute pulmonary coccidioidomycosis  
 B38.1 Chronic pulmonary coccidioidomycosis  
 B38.2 Pulmonary coccidioidomycosis, unspecified  
 B38.3 Cutaneous coccidioidomycosis  
 B38.4 Coccidioidomycosis meningitis  
 B41.0 Pulmonary paracoccidioidomycosis  
 B41.7 Disseminated paracoccidioidomycosis  
 B41.8 Other forms of paracoccidioidomycosis  
 B41.9 Paracoccidioidomycosis, unspecified  
 B43.1 Phaeomycotic brain abscess  
 B43.2 Subcutaneous phaeomycotic abscess and cyst  
 B44.0 Invasive pulmonary aspergillosis  
 B44.1 Other pulmonary aspergillosis  
 B44.2 Tonsillar aspergillosis  
 B44.7 Disseminated aspergillosis  
 B44.8 Other forms of aspergillosis  
 B44.9 Aspergillosis, unspecified  
 B45.0 Pulmonary cryptococcosis  
 B45.1 Cerebral cryptococcosis  
 B45.2 Cutaneous cryptococcosis  
 B45.3 Osseous cryptococcosis  
 B45.7 Disseminated cryptococcosis  
 B45.8 Other forms of cryptococcosis  
 B45.9 Cryptococcosis, unspecified  
 B46.8 Other zygomycoses  
 B47.1 Actinomycetoma  
 B48.7 Opportunistic mycoses  
 B48.8 Other specified mycoses  
 B50.0 Plasmodium falciparum malaria with cerebral complications  
 B50.8 Other severe and complicated Plasmodium falciparum malaria  
 B50.9 Plasmodium falciparum malaria, unspecified  
 B51.0 Plasmodium vivax malaria with rupture of spleen  
 B51.8 Plasmodium vivax malaria with other complications  
 B51.9 Plasmodium vivax malaria without complication  
 B52.0 Plasmodium malariae malaria with nephropathy  
 B52.8 Plasmodium malariae malaria with other complications  
 B52.9 Plasmodium malariae malaria without complication  
 B53.0 Plasmodium ovale malaria  
 B53.1 Malaria due to simian plasmodia  
 B53.8 Other parasitologically confirmed malaria, not elsewhere classified  
 B54 Unspecified malaria  
 B55.0 Visceral leishmaniasis  
 B55.1 Cutaneous leishmaniasis

B55.2 Mucocutaneous leishmaniasis  
 B55.9 Leishmaniasis, unspecified  
 B56.0 Gambiense trypanosomiasis  
 B56.1 Rhodesiense trypanosomiasis  
 B56.9 African trypanosomiasis, unspecified  
 B58 Toxoplasmosis  
 B58.0 Toxoplasma oculopathy  
 B58.1 Toxoplasma hepatitis  
 B58.2 Toxoplasma meningoencephalitis  
 B58.3 Pulmonary toxoplasmosis  
 B58.8 Toxoplasmosis with other organ involvement  
 B58.9 Toxoplasmosis, unspecified  
 B60.0 Babesiosis  
 B60.1 Acanthamoebiasis  
 B60.2 Negleriasis  
 B60.8 Other specified protozoal diseases  
 B64 Unspecified protozoal disease  
 B65 Schistosomiasis [bilharziasis]  
 B65.0 Schistosomiasis due to *Schistosoma haematobium* [urinary schistosomiasis]  
 B65.1 Schistosomiasis due to *Schistosoma Mansoni* [intestinal schistosomiasis]  
 B65.2 Schistosomiasis due to *Schistosoma japonicum*  
 B65.8 Other schistosomiasis  
 B65.9 Schistosomiasis, unspecified  
 B67.8 Echinococcosis, unspecified, of liver  
 B67.9 Echinococcosis, other and unspecified  
 B71.0 Hymenolepiasis  
 B71.8 Other specified cestode infections  
 B71.9 Cestode infection, unspecified  
 B76.1 Necatoriasis  
 B81.0 Anisakiasis  
 B81.4 Mixed intestinal helminthiasis  
 B81.8 Other specified intestinal helminthiasis  
 B82.0 Intestinal helminthiasis, unspecified  
 B82.9 Intestinal parasitism, unspecified  
 B83.0 Visceral larva migrans  
 B83.8 Other specified helminthiasis  
 B83.9 Helminthiasis, unspecified  
 B85.0 Pediculosis due to *Pediculus humanus capitis*  
 B85.1 Pediculosis due to *Pediculus humanus corporis*  
 B85.2 Pediculosis, unspecified  
 B85.4 Mixed pediculosis and phthiriasis  
 B87.0 Cutaneous myiasis  
 B87.1 Wound myiasis

B87.2 Ocular myiasis  
 B87.3 Nasopharyngeal myiasis  
 B87.4 Aural myiasis  
 B87.8 Myiasis of other sites  
 B87.9 Myiasis, unspecified  
 B88.0 Other acariasis  
 B89 Unspecified parasitic disease  
 B91 Sequelae of poliomyelitis  
 B92 Sequelae of leprosy  
 B94.0 Sequelae of trachoma  
 B94.1 Sequelae of viral encephalitis  
 B94.2 Sequelae of viral hepatitis  
 B94.8 Sequelae of other specified infectious and parasitic diseases  
 B94.9 Sequelae of unspecified infectious or parasitic disease  
 B95.0 Streptococcus, group A, as the cause of diseases classified to other chapters  
 B95.1 Streptococcus, group B, as the cause of diseases classified to other chapters  
 B95.2 Streptococcus, group D, as the cause of diseases classified to other chapters  
 B95.3 Streptococcus pneumoniae as the cause of diseases classified to other chapters  
 B95.4 Other streptococcus as the cause of diseases classified to other chapters  
 B95.5 Unspecified streptococcus as the cause of diseases classified to other chapters  
 B95.6 Staphylococcus aureus as the cause of diseases classified to other chapters  
 B95.7 Other staphylococcus as the cause of diseases classified to other chapters  
 B95.8 Unspecified staphylococcus as the cause of diseases classified to other chapters  
 B96.0 Mycoplasma pneumoniae [M. pneumoniae] as the cause of diseases classified to other chapters  
 B96.1 Klebsiella pneumoniae [K. pneumoniae] as the cause of diseases classified to other chapters  
 B96.2 Escherichia coli [E. coli] as the cause of diseases classified to other chapters  
 B96.3 Haemophilus influenzae [H. influenzae] as the cause of diseases classified to other chapters  
 B96.4 Proteus (mirabilis)(morganii) as the cause of diseases classified to other chapters  
 B96.5 Pseudomonas (aeruginosa)(mallei)(pseudomallei) as the cause of diseases classified to other chapters  
 B96.6 Clostridium perfringens [C. perfringens] as the cause of diseases classified to other chapters  
 B96.7 Clostridium perfringens [C. perfringens] as the cause of diseases classified to other chapters  
 B96.8 Other specified bacterial agents as the cause of diseases classified to other chapters  
 B97.0 Adenovirus as the cause of diseases classified to other chapters  
 B97.1 Enterovirus as the cause of diseases classified to other chapters  
 B97.2 Coronavirus as the cause of diseases classified to other chapters  
 B97.3 Retrovirus as the cause of diseases classified to other chapters  
 B97.4 Respiratory syncytial virus as the cause of diseases classified to other chapters  
 B97.5 Reovirus as the cause of diseases classified to other chapters  
 B97.6 Parvovirus as the cause of diseases classified to other chapters  
 B97.7 Papillomavirus as the cause of diseases classified to other chapters  
 B97.8 Other viral agents as the cause of diseases classified to other chapters  
 D47.5 Chronic eosinophilic leukaemia [hypereosinophilic syndrome]

D73.3 Abscess of spleen  
E32.1 Abscess of thymus  
G00.0 Haemophilus meningitis  
G00.1 Pneumococcal meningitis  
G00.2 Streptococcal meningitis  
G00.3 Staphylococcal meningitis  
G00.8 Other bacterial meningitis  
G00.9 Bacterial meningitis, unspecified  
G01 Meningitis in bacterial diseases classified elsewhere  
G02.0 Meningitis in viral diseases classified elsewhere  
G02.1 Meningitis in mycoses  
G02.8 Meningitis in other specified infectious and parasitic diseases classified elsewhere  
G03.0 Nonpyogenic meningitis  
G03.1 Chronic meningitis  
G03.2 Benign recurrent meningitis [Mollaret]  
G03.8 Meningitis due to other specified causes  
G03.9 Meningitis, unspecified  
G04.2 Bacterial meningoencephalitis and meningomyelitis, not elsewhere classified  
G05.0 Encephalitis, myelitis and encephalomyelitis in bacterial diseases classified elsewhere  
G05.1 Encephalitis, myelitis and encephalomyelitis in viral diseases classified elsewhere  
G05.2 Encephalitis, myelitis and encephalomyelitis in other infectious and parasitic diseases classified elsewhere  
G06.0 Intracranial abscess and granuloma  
G06.1 Intrapinal abscess and granuloma  
G06.2 Extradural and subdural abscess, unspecified  
G07 Intracranial and intraspinal abscess and granuloma in diseases classified elsewhere  
G14 Postpolio syndrome  
G53.0 Postzoster neuralgia  
G53.1 Multiple cranial nerve palsies in infectious and parasitic diseases classified elsewhere  
G63.0 Polyneuropathy in infectious and parasitic diseases classified elsewhere  
G73.1 Eaton-Lambert syndrome  
G73.4 Myopathy in infectious and parasitic diseases classified elsewhere  
G93.3 Postviral fatigue syndrome  
G94.0 Hydrocephalus in infectious and parasitic diseases classified elsewhere  
H03.0 Parasitic infestation of eyelid in diseases classified elsewhere  
H06.1 Parasitic infestation of orbit in diseases classified elsewhere  
H10.0 Mucopurulent conjunctivitis  
H10.2 Other acute conjunctivitis  
H10.3 Acute conjunctivitis, unspecified  
H10.4 Chronic conjunctivitis  
H10.5 Blepharoconjunctivitis  
H10.8 Other conjunctivitis  
H10.9 Conjunctivitis, unspecified  
H13.0 Filarial infection of conjunctiva

H13.1 Conjunctivitis in infectious and parasitic diseases classified elsewhere  
 H13.2 Conjunctivitis in other diseases classified elsewhere  
 H16.1 Other superficial keratitis without conjunctivitis  
 H16.2 Keratoconjunctivitis  
 H19.1 Herpesviral keratitis and keratoconjunctivitis  
 H19.2 Keratitis and keratoconjunctivitis in other infectious and parasitic diseases classified elsewhere  
 H19.3 Keratitis and keratoconjunctivitis in other diseases classified elsewhere  
 H22.0 Iridocyclitis in infectious and parasitic diseases classified elsewhere  
 H32.0 Chorioretinal inflammation in infectious and parasitic diseases classified elsewhere  
 H60.0 Abscess of external ear  
 H60.1 Cellulitis of external ear  
 H60.2 Malignant otitis externa  
 H60.3 Other infective otitis externa  
 H60.5 Acute otitis externa, non-infective  
 H60.8 Other otitis externa  
 H60.9 Otitis externa, unspecified  
 H62.0 Otitis externa in bacterial diseases classified elsewhere  
 H62.1 Otitis externa in viral diseases classified elsewhere  
 H62.3 Otitis externa in other infectious and parasitic diseases classified elsewhere  
 H62.4 Otitis externa in other diseases classified elsewhere  
 H65.0 Acute serous otitis media  
 H65.1 Other acute nonsuppurative otitis media  
 H65.2 Chronic serous otitis media  
 H65.3 Chronic mucoid otitis media  
 H65.4 Other chronic nonsuppurative otitis media  
 H65.9 Nonsuppurative otitis media, unspecified  
 H66.0 Acute suppurative otitis media  
 H66.1 Chronic tubotympanic suppurative otitis media  
 H66.2 Chronic atticofacial suppurative otitis media  
 H66.3 Other chronic suppurative otitis media  
 H66.4 Suppurative otitis media, unspecified  
 H66.9 Otitis media, unspecified  
 H67.0 Otitis media in bacterial diseases classified elsewhere  
 H67.1 Otitis media in viral diseases classified elsewhere  
 H67.8 Otitis media in other diseases classified elsewhere  
 H70.0 Acute mastoiditis  
 H70.1 Chronic mastoiditis  
 H70.8 Other mastoiditis and related conditions  
 H70.9 Mastoiditis, unspecified  
 H73.0 Acute myringitis  
 H73.1 Chronic myringitis  
 H75.0 Mastoiditis in infectious and parasitic diseases classified elsewhere  
 H94.0 Acoustic neuritis in infectious and parasitic diseases classified elsewhere

I32.0 Pericarditis in bacterial diseases classified elsewhere  
 I32.1 Pericarditis in other infectious and parasitic diseases classified elsewhere  
 I33.0 Acute and subacute infective endocarditis  
 I33.9 Acute endocarditis, unspecified  
 I38 Endocarditis, valve unspecified  
 I39 Endocarditis and heart valve disorders in diseases classified elsewhere  
 I39.1 Aortic valve disorders in diseases classified elsewhere  
 I39.2 Tricuspid valve disorders in diseases classified elsewhere  
 I39.3 Pulmonary valve disorders in diseases classified elsewhere  
 I39.4 Multiple valve disorders in diseases classified elsewhere  
 I39.8 Endocarditis, valve unspecified, in diseases classified elsewhere  
 I40.0 Infective myocarditis  
 I41.0 Myocarditis in bacterial diseases classified elsewhere  
 I41.1 Myocarditis in viral diseases classified elsewhere  
 I41.2 Myocarditis in other infectious and parasitic diseases classified elsewhere  
 I42.3 Endomyocardial (eosinophilic) disease  
 I43.0 Cardiomyopathy in infectious and parasitic diseases classified elsewhere  
 I52.0 Other heart disorders in bacterial diseases classified elsewhere  
 I52.1 Other heart disorders in other infectious and parasitic diseases classified elsewhere  
 I68.1 Cerebral arteritis in infectious and parasitic diseases classified elsewhere  
 I98.1 Cardiovascular disorders in other infectious and parasitic diseases classified elsewhere  
 J00 Acute nasopharyngitis [common cold]  
 J01.0 Acute maxillary sinusitis  
 J01.1 Acute frontal sinusitis  
 J01.2 Acute ethmoidal sinusitis  
 J01.3 Acute sphenoidal sinusitis  
 J01.4 Acute pansinusitis  
 J01.8 Other acute sinusitis  
 J01.9 Acute sinusitis, unspecified  
 J02.0 Streptococcal pharyngitis  
 J02.8 Acute pharyngitis due to other specified organisms  
 J02.9 Acute pharyngitis, unspecified  
 J03.0 Streptococcal tonsillitis  
 J03.8 Acute tonsillitis due to other specified organisms  
 J03.9 Acute tonsillitis, unspecified  
 J06.0 Acute laryngopharyngitis  
 J06.8 Other acute upper respiratory infections of multiple sites  
 J06.9 Acute upper respiratory infection, unspecified  
 J09 Influenza due to certain identified influenza virus  
 J10.0 Influenza with pneumonia, influenza virus identified  
 J10.1 Influenza with other respiratory manifestations, influenza virus identified  
 J10.8 Influenza with other manifestations, influenza virus identified  
 J11.0 Influenza with pneumonia, virus not identified



J11.1 Influenza with other respiratory manifestations, virus not identified  
 J11.8 Influenza with other manifestations, virus not identified  
 J12 Viral pneumonia, not elsewhere classified  
 J12.0 Adenoviral pneumonia  
 J12.1 Respiratory syncytial virus pneumonia  
 J12.2 Parainfluenza virus pneumonia  
 J12.3 Human metapneumovirus pneumonia  
 J12.8 Other viral pneumonia  
 J12.9 Viral pneumonia, unspecified  
 J13 Pneumonia due to *Streptococcus pneumoniae*  
 J14 Pneumonia due to *Haemophilus influenzae*  
 J15.0 Pneumonia due to *Klebsiella pneumoniae*  
 J15.1 Pneumonia due to *Pseudomonas*  
 J15.2 Pneumonia due to staphylococcus  
 J15.3 Pneumonia due to streptococcus, group B  
 J15.4 Pneumonia due to other streptococci  
 J15.5 Pneumonia due to *Escherichia coli*  
 J15.6 Pneumonia due to other aerobic Gram-negative bacteria  
 J15.7 Pneumonia due to *Mycoplasma pneumoniae*  
 J15.8 Other bacterial pneumonia  
 J15.9 Bacterial pneumonia, unspecified  
 J16.0 Chlamydial pneumonia  
 J16.8 Pneumonia due to other specified infectious organisms  
 J17.0 Pneumonia in bacterial diseases classified elsewhere  
 J17.1 Pneumonia in viral diseases classified elsewhere  
 J17.2 Pneumonia in mycoses  
 J17.3 Pneumonia in parasitic diseases  
 J17.8 Pneumonia in other diseases classified elsewhere  
 J18.0 Bronchopneumonia, unspecified  
 J18.1 Lobar pneumonia, unspecified  
 J18.2 Hypostatic pneumonia, unspecified  
 J18.8 Other pneumonia, organism unspecified  
 J18.9 Pneumonia, unspecified  
 J20.0 Acute bronchitis due to *Mycoplasma pneumoniae*  
 J20.1 Acute bronchitis due to *Haemophilus influenzae*  
 J20.2 Acute bronchitis due to streptococcus  
 J20.3 Acute bronchitis due to coxsackie virus  
 J20.4 Acute bronchitis due to parainfluenza virus  
 J20.5 Acute bronchitis due to respiratory syncytial virus  
 J20.6 Acute bronchitis due to rhinovirus  
 J20.7 Acute bronchitis due to echovirus  
 J21.0 Acute bronchiolitis due to respiratory syncytial virus  
 J21.1 Acute bronchiolitis due to human metapneumovirus

|       |                                                                                       |
|-------|---------------------------------------------------------------------------------------|
| J22   | Unspecified acute lower respiratory infection                                         |
| J31   | Chronic rhinitis, nasopharyngitis and pharyngitis                                     |
| J31.0 | Chronic rhinitis                                                                      |
| J31.1 | Chronic nasopharyngitis                                                               |
| J31.2 | Chronic pharyngitis                                                                   |
| J32.0 | Chronic maxillary sinusitis                                                           |
| J32.1 | Chronic frontal sinusitis                                                             |
| J32.2 | Chronic ethmoidal sinusitis                                                           |
| J32.3 | Chronic sphenoidal sinusitis                                                          |
| J32.4 | Chronic pansinusitis                                                                  |
| J32.8 | Other chronic sinusitis                                                               |
| J32.9 | Chronic sinusitis, unspecified                                                        |
| J34.0 | Abscess, furuncle and carbuncle of nose                                               |
| J35.0 | Chronic tonsillitis                                                                   |
| J36   | Peritonsillar abscess                                                                 |
| J39.0 | Retropharyngeal and parapharyngeal abscess                                            |
| J39.1 | Other abscess of pharynx                                                              |
| J44.0 | Chronic obstructive pulmonary disease with acute lower respiratory infection          |
| J65   | Pneumoconiosis associated with tuberculosis                                           |
| J85.0 | Gangrene and necrosis of lung                                                         |
| J85.1 | Abscess of lung with pneumonia                                                        |
| J85.2 | Abscess of lung without pneumonia                                                     |
| J85.3 | Abscess of mediastinum                                                                |
| K04.6 | Periapical abscess with sinus                                                         |
| K04.7 | Periapical abscess without sinus                                                      |
| K11.3 | Abscess of salivary gland                                                             |
| K12.2 | Cellulitis and abscess of mouth                                                       |
| K23.0 | Tuberculous oesophagitis                                                              |
| K35.2 | Acute appendicitis with generalized peritonitis                                       |
| K35.3 | Acute appendicitis with localized peritonitis                                         |
| K35.8 | Acute appendicitis, other and unspecified                                             |
| K36   | Other appendicitis                                                                    |
| K37   | Unspecified appendicitis                                                              |
| K51.5 | Mucosal proctocolitis                                                                 |
| K52.3 | Indeterminate colitis                                                                 |
| K57.0 | Diverticular disease of small intestine with perforation and abscess                  |
| K57.1 | Diverticular disease of small intestine without perforation or abscess                |
| K57.2 | Diverticular disease of large intestine with perforation and abscess                  |
| K57.3 | Diverticular disease of large intestine without perforation or abscess                |
| K57.4 | Diverticular disease of both small and large intestine with perforation and abscess   |
| K57.5 | Diverticular disease of both small and large intestine without perforation or abscess |
| K57.8 | Diverticular disease of intestine, part unspecified, with perforation and abscess     |
| K57.9 | Diverticular disease of intestine, part unspecified, without perforation or abscess   |

K61.0 Anal abscess  
 K61.1 Rectal abscess  
 K61.2 Anorectal abscess  
 K61.3 Ischiorectal abscess  
 K61.4 Intrasphincteric abscess  
 K63.0 Abscess of intestine  
 K65.0 Acute peritonitis  
 K65.8 Other peritonitis  
 K65.9 Peritonitis, unspecified  
 K67.0 Chlamydial peritonitis  
 K67.1 Gonococcal peritonitis  
 K67.2 Syphilitic peritonitis  
 K67.3 Tuberculous peritonitis  
 K75.0 Abscess of liver  
 K77.0 Liver disorders in infectious and parasitic diseases classified elsewhere  
 K80.0 Calculus of gallbladder with acute cholecystitis  
 K80.1 Calculus of gallbladder with other cholecystitis  
 K80.2 Calculus of gallbladder without cholecystitis  
 K80.3 Calculus of bile duct with cholangitis  
 K80.36 Calculus of bile duct with acute and chronic cholangitis without obstruction  
 K80.4 Calculus of bile duct with cholecystitis  
 K80.5 Calculus of bile duct without cholangitis or cholecystitis  
 K81.0 Acute cholecystitis  
 K81.1 Chronic cholecystitis  
 K81.9 Cholecystitis, unspecified  
 K83.0 Cholangitis  
 K93.0 Tuberculous disorders of intestines, peritoneum and mesenteric glands  
 L00 Staphylococcal scalded skin syndrome  
 L02.0 Cutaneous abscess, furuncle and carbuncle of face  
 L02.1 Cutaneous abscess, furuncle and carbuncle of neck  
 L02.2 Cutaneous abscess, furuncle and carbuncle of trunk  
 L02.3 Cutaneous abscess, furuncle and carbuncle of buttock  
 L02.4 Cutaneous abscess, furuncle and carbuncle of limb  
 L02.8 Cutaneous abscess, furuncle and carbuncle of other sites  
 L02.9 Cutaneous abscess, furuncle and carbuncle, unspecified  
 L03 Cellulitis  
 L03.0 Cellulitis of finger and toe  
 L03.1 Cellulitis of other parts of limb  
 L03.2 Cellulitis of face  
 L03.3 Cellulitis of trunk  
 L03.8 Cellulitis of other sites  
 L03.9 Cellulitis, unspecified  
 L05.0 Pilonidal cyst with abscess

|        |                                                                                       |
|--------|---------------------------------------------------------------------------------------|
| L05.9  | Pilonidal cyst without abscess                                                        |
| L92.2  | Granuloma faciale [eosinophilic granuloma of skin]                                    |
| L98.3  | Eosinophilic cellulitis [Wells]                                                       |
| M00    | Pyogenic arthritis                                                                    |
| M00.0  | Staphylococcal arthritis and polyarthritis                                            |
| M00.00 | Staphylococcal arthritis and polyarthritis (Multiple sites)                           |
| M00.01 | Staphylococcal arthritis and polyarthritis (Shoulder region)                          |
| M00.02 | Staphylococcal arthritis and polyarthritis (Upper arm)                                |
| M00.03 | Staphylococcal arthritis and polyarthritis (Forearm)                                  |
| M00.04 | Staphylococcal arthritis and polyarthritis (Hand)                                     |
| M00.05 | Staphylococcal arthritis and polyarthritis (Pelvic region and thigh)                  |
| M00.06 | Staphylococcal arthritis and polyarthritis (Lower leg)                                |
| M00.07 | Staphylococcal arthritis and polyarthritis (Ankle and foot)                           |
| M00.08 | Staphylococcal arthritis and polyarthritis (Other)                                    |
| M00.09 | Staphylococcal arthritis and polyarthritis (Site unspecified)                         |
| M00.1  | Pneumococcal arthritis and polyarthritis                                              |
| M00.10 | Pneumococcal arthritis and polyarthritis (Multiple sites)                             |
| M00.11 | Pneumococcal arthritis and polyarthritis (Shoulder region)                            |
| M00.12 | Pneumococcal arthritis and polyarthritis (Upper arm)                                  |
| M00.13 | Pneumococcal arthritis and polyarthritis (Forearm)                                    |
| M00.14 | Pneumococcal arthritis and polyarthritis (Hand)                                       |
| M00.15 | Pneumococcal arthritis and polyarthritis (Pelvic region and thigh)                    |
| M00.16 | Pneumococcal arthritis and polyarthritis (Lower leg)                                  |
| M00.17 | Pneumococcal arthritis and polyarthritis (Ankle and foot)                             |
| M00.18 | Pneumococcal arthritis and polyarthritis (Other)                                      |
| M00.19 | Pneumococcal arthritis and polyarthritis (Site unspecified)                           |
| M00.2  | Other streptococcal arthritis and polyarthritis                                       |
| M00.20 | Other streptococcal arthritis and polyarthritis (Multiple sites)                      |
| M00.21 | Other streptococcal arthritis and polyarthritis (Shoulder region)                     |
| M00.22 | Other streptococcal arthritis and polyarthritis (Upper arm)                           |
| M00.23 | Other streptococcal arthritis and polyarthritis (Forearm)                             |
| M00.24 | Other streptococcal arthritis and polyarthritis (Hand)                                |
| M00.25 | Other streptococcal arthritis and polyarthritis (Pelvic region and thigh)             |
| M00.26 | Other streptococcal arthritis and polyarthritis (Lower leg)                           |
| M00.27 | Other streptococcal arthritis and polyarthritis (Ankle and foot)                      |
| M00.28 | Other streptococcal arthritis and polyarthritis (Other)                               |
| M00.29 | Other streptococcal arthritis and polyarthritis (Site unspecified)                    |
| M00.8  | Arthritis and polyarthritis due to other specified bacterial agents                   |
| M00.80 | Arthritis and polyarthritis due to other specified bacterial agents (Multiple sites)  |
| M00.81 | Arthritis and polyarthritis due to other specified bacterial agents (Shoulder region) |
| M00.82 | Arthritis and polyarthritis due to other specified bacterial agents (Upper arm)       |
| M00.83 | Arthritis and polyarthritis due to other specified bacterial agents (Forearm)         |
| M00.84 | Arthritis and polyarthritis due to other specified bacterial agents (Hand)            |

M00.85 Arthritis and polyarthritis due to other specified bacterial agents (Pelvic region and thigh)  
M00.86 Arthritis and polyarthritis due to other specified bacterial agents (Lower leg)  
M00.87 Arthritis and polyarthritis due to other specified bacterial agents (Ankle and foot)  
M00.88 Arthritis and polyarthritis due to other specified bacterial agents (Other)  
M00.89 Arthritis and polyarthritis due to other specified bacterial agents (Site unspecified)  
M01.0 Meningococcal arthritis  
M01.00 Meningococcal arthritis (Multiple sites)  
M01.01 Meningococcal arthritis (Shoulder region)  
M01.02 Meningococcal arthritis (Upper arm)  
M01.03 Meningococcal arthritis (Forearm)  
M01.04 Meningococcal arthritis (Hand)  
M01.05 Meningococcal arthritis (Pelvic region and thigh)  
M01.06 Meningococcal arthritis (Lower leg)  
M01.07 Meningococcal arthritis (Ankle and foot)  
M01.08 Meningococcal arthritis (Other)  
M01.09 Meningococcal arthritis (Site unspecified)  
M01.1 Tuberculous arthritis  
M01.10 Tuberculous arthritis (Multiple sites)  
M01.11 Tuberculous arthritis (Shoulder region)  
M01.12 Tuberculous arthritis (Upper arm)  
M01.13 Tuberculous arthritis (Forearm)  
M01.14 Tuberculous arthritis (Hand)  
M01.15 Tuberculous arthritis (Pelvic region and thigh)  
M01.16 Tuberculous arthritis (Lower leg)  
M01.17 Tuberculous arthritis (Ankle and foot)  
M01.18 Tuberculous arthritis (Other)  
M01.19 Tuberculous arthritis (Site unspecified)  
M01.3 Arthritis in other bacterial diseases classified elsewhere  
M01.30 Arthritis in other bacterial diseases classified elsewhere (Multiple sites)  
M01.31 Arthritis in other bacterial diseases classified elsewhere (Shoulder region)  
M01.32 Arthritis in other bacterial diseases classified elsewhere (Upper arm)  
M01.33 Arthritis in other bacterial diseases classified elsewhere (Forearm)  
M01.34 Arthritis in other bacterial diseases classified elsewhere (Hand)  
M01.35 Arthritis in other bacterial diseases classified elsewhere (Pelvic region and thigh)  
M01.36 Arthritis in other bacterial diseases classified elsewhere (Lower leg)  
M01.37 Arthritis in other bacterial diseases classified elsewhere (Ankle and foot)  
M01.38 Arthritis in other bacterial diseases classified elsewhere (Other)  
M01.39 Arthritis in other bacterial diseases classified elsewhere (Site unspecified)  
M01.4 Rubella arthritis  
M01.40 Rubella arthritis (Multiple sites)  
M01.41 Rubella arthritis (Shoulder region)  
M01.42 Rubella arthritis (Upper arm)  
M01.43 Rubella arthritis (Forearm)

M01.44 Rubella arthritis (Hand)  
M01.45 Rubella arthritis (Pelvic region and thigh)  
M01.46 Rubella arthritis (Lower leg)  
M01.47 Rubella arthritis (Ankle and foot)  
M01.48 Rubella arthritis (Other)  
M01.49 Rubella arthritis (Site unspecified)  
M01.5 Arthritis in other viral diseases classified elsewhere  
M01.50 Arthritis in other viral diseases classified elsewhere (Multiple sites)  
M01.51 Arthritis in other viral diseases classified elsewhere (Shoulder region)  
M01.52 Arthritis in other viral diseases classified elsewhere (Upper arm)  
M01.53 Arthritis in other viral diseases classified elsewhere (Forearm)  
M01.54 Arthritis in other viral diseases classified elsewhere (Hand)  
M01.55 Arthritis in other viral diseases classified elsewhere (Pelvic region and thigh)  
M01.56 Arthritis in other viral diseases classified elsewhere (Lower leg)  
M01.57 Arthritis in other viral diseases classified elsewhere (Ankle and foot)  
M01.58 Arthritis in other viral diseases classified elsewhere (Other)  
M01.59 Arthritis in other viral diseases classified elsewhere (Site unspecified)  
M01.6 Arthritis in mycoses  
M01.60 Arthritis in mycoses (Multiple sites)  
M01.61 Arthritis in mycoses (Shoulder region)  
M01.62 Arthritis in mycoses (Upper arm)  
M01.63 Arthritis in mycoses (Forearm)  
M01.64 Arthritis in mycoses (Hand)  
M01.65 Arthritis in mycoses (Pelvic region and thigh)  
M01.66 Arthritis in mycoses (Lower leg)  
M01.67 Arthritis in mycoses (Ankle and foot)  
M01.68 Arthritis in mycoses (Other)  
M01.69 Arthritis in mycoses (Site unspecified)  
M02.30 Reiter's disease (Multiple sites)  
M02.31 Reiter's disease (Shoulder region)  
M02.32 Reiter's disease (Upper arm)  
M02.33 Reiter's disease (Forearm)  
M02.34 Reiter's disease (Hand)  
M02.35 Reiter's disease (Pelvic region and thigh)  
M02.36 Reiter's disease (Lower leg)  
M02.37 Reiter's disease (Ankle and foot)  
M02.38 Reiter's disease (Other)  
M02.39 Reiter's disease (Site unspecified)  
M03.0 Postmeningococcal arthritis  
M03.00 Postmeningococcal arthritis (Multiple sites)  
M03.01 Postmeningococcal arthritis (Shoulder region)  
M03.02 Postmeningococcal arthritis (Upper arm)  
M03.03 Postmeningococcal arthritis (Forearm)

M03.04 Postmeningococcal arthritis (Hand)  
M03.05 Postmeningococcal arthritis (Pelvic region and thigh)  
M03.06 Postmeningococcal arthritis (Lower leg)  
M03.07 Postmeningococcal arthritis (Ankle and foot)  
M03.08 Postmeningococcal arthritis (Other)  
M03.09 Postmeningococcal arthritis (Site unspecified)  
M03.1 Postinfective arthropathy in syphilis  
M03.10 Postinfective arthropathy in syphilis (Multiple sites)  
M03.11 Postinfective arthropathy in syphilis (Shoulder region)  
M03.12 Postinfective arthropathy in syphilis (Upper arm)  
M03.13 Postinfective arthropathy in syphilis (Forearm)  
M03.14 Postinfective arthropathy in syphilis (Hand)  
M03.15 Postinfective arthropathy in syphilis (Pelvic region and thigh)  
M03.16 Postinfective arthropathy in syphilis (Lower leg)  
M03.17 Postinfective arthropathy in syphilis (Ankle and foot)  
M03.18 Postinfective arthropathy in syphilis (Other)  
M03.19 Postinfective arthropathy in syphilis (Site unspecified)  
M35.4 Diffuse (eosinophilic) fasciitis  
M46.2 Osteomyelitis of vertebra  
M46.20 Osteomyelitis of vertebra (Multiple sites in spine)  
M46.21 Osteomyelitis of vertebra (Occipito-atlanto-axial region)  
M46.22 Osteomyelitis of vertebra (Cervical region)  
M46.23 Osteomyelitis of vertebra (Cervicothoracic region)  
M46.24 Osteomyelitis of vertebra (Thoracic region)  
M46.25 Osteomyelitis of vertebra (Thoracolumbar region)  
M46.26 Osteomyelitis of vertebra (Lumbar region)  
M46.27 Osteomyelitis of vertebra (Lumbosacral region)  
M46.28 Osteomyelitis of vertebra (Sacral and sacrococcygeal region)  
M46.29 Osteomyelitis of vertebra (Site unspecified)  
M49.0 Tuberculosis of spine  
M49.00 Tuberculosis of spine (Multiple sites in spine)  
M49.01 Tuberculosis of spine (Occipito-atlanto-axial region)  
M49.02 Tuberculosis of spine (Cervical region)  
M49.03 Tuberculosis of spine (Cervicothoracic region)  
M49.04 Tuberculosis of spine (Thoracic region)  
M49.05 Tuberculosis of spine (Thoracolumbar region)  
M49.06 Tuberculosis of spine (Lumbar region)  
M49.07 Tuberculosis of spine (Lumbosacral region)  
M49.08 Tuberculosis of spine (Sacral and sacrococcygeal region)  
M49.09 Tuberculosis of spine (Site unspecified)  
M49.1 Brucella spondylitis  
M49.10 Brucella spondylitis (Multiple sites in spine)  
M49.11 Brucella spondylitis (Occipito-atlanto-axial region)

- M49.12 Brucella spondylitis (Cervical region)
- M49.13 Brucella spondylitis (Cervicothoracic region)
- M49.14 Brucella spondylitis (Thoracic region)
- M49.15 Brucella spondylitis (Thoracolumbar region)
- M49.16 Brucella spondylitis (Lumbar region)
- M49.17 Brucella spondylitis (Lumbosacral region)
- M49.18 Brucella spondylitis (Sacral and sacrococcygeal region)
- M49.19 Brucella spondylitis (Site unspecified)
- M49.2 Enterobacterial spondylitis
- M49.20 Enterobacterial spondylitis (Multiple sites in spine)
- M49.21 Enterobacterial spondylitis (Occipito-atlanto-axial region)
- M49.22 Enterobacterial spondylitis (Cervical region)
- M49.23 Enterobacterial spondylitis (Cervicothoracic region)
- M49.24 Enterobacterial spondylitis (Thoracic region)
- M49.25 Enterobacterial spondylitis (Thoracolumbar region)
- M49.26 Enterobacterial spondylitis (Lumbar region)
- M49.27 Enterobacterial spondylitis (Lumbosacral region)
- M49.28 Enterobacterial spondylitis (Sacral and sacrococcygeal region)
- M49.29 Enterobacterial spondylitis (Site unspecified)
- M49.3 Spondylopathy in other infectious and parasitic diseases classified elsewhere
- M49.30 Spondylopathy in other infectious and parasitic diseases classified elsewhere (Multiple sites in spine)
- M49.31 Spondylopathy in other infectious and parasitic diseases classified elsewhere (Occipito-atlanto-axial region)
- M49.32 Spondylopathy in other infectious and parasitic diseases classified elsewhere (Cervical region)
- M49.33 Spondylopathy in other infectious and parasitic diseases classified elsewhere (Cervicothoracic region)
- M49.34 Spondylopathy in other infectious and parasitic diseases classified elsewhere (Thoracic region)
- M49.35 Spondylopathy in other infectious and parasitic diseases classified elsewhere (Thoracolumbar region)
- M49.36 Spondylopathy in other infectious and parasitic diseases classified elsewhere (Lumbar region)
- M49.37 Spondylopathy in other infectious and parasitic diseases classified elsewhere (Lumbosacral region)
- M49.38 Spondylopathy in other infectious and parasitic diseases classified elsewhere (Sacral and sacrococcygeal region)
- M49.39 Spondylopathy in other infectious and parasitic diseases classified elsewhere (Site unspecified)
- M63.0 Myositis in bacterial diseases classified elsewhere
- M63.1 Myositis in protozoal and parasitic infections classified elsewhere
- M65.0 Abscess of tendon sheath
- M65.00 Abscess of tendon sheath (Multiple sites)
- M65.01 Abscess of tendon sheath (Shoulder region)
- M65.02 Abscess of tendon sheath (Upper arm)
- M65.03 Abscess of tendon sheath (Forearm)
- M65.04 Abscess of tendon sheath (Hand)
- M65.05 Abscess of tendon sheath (Pelvic region and thigh)



M65.06 Abscess of tendon sheath (Lower leg)  
M65.07 Abscess of tendon sheath (Ankle and foot)  
M65.08 Abscess of tendon sheath (Other)  
M65.09 Abscess of tendon sheath (Site unspecified)  
M68.0 Synovitis and tenosynovitis in bacterial diseases classified elsewhere  
M71.0 Abscess of bursa  
M71.00 Abscess of bursa (Multiple sites)  
M71.01 Abscess of bursa (Shoulder region)  
M71.02 Abscess of bursa (Upper arm)  
M71.03 Abscess of bursa (Forearm)  
M71.04 Abscess of bursa (Hand)  
M71.05 Abscess of bursa (Pelvic region and thigh)  
M71.06 Abscess of bursa (Lower leg)  
M71.07 Abscess of bursa (Ankle and foot)  
M71.08 Abscess of bursa (Other)  
M71.09 Abscess of bursa (Site unspecified)  
M73.0 Gonococcal bursitis  
M73.00 Gonococcal bursitis (Multiple sites)  
M73.01 Gonococcal bursitis (Shoulder region)  
M73.02 Gonococcal bursitis (Upper arm)  
M73.03 Gonococcal bursitis (Forearm)  
M73.04 Gonococcal bursitis (Hand)  
M73.05 Gonococcal bursitis (Pelvic region and thigh)  
M73.06 Gonococcal bursitis (Lower leg)  
M73.07 Gonococcal bursitis (Ankle and foot)  
M73.08 Gonococcal bursitis (Other)  
M73.09 Gonococcal bursitis (Site unspecified)  
M86.0 Acute haematogenous osteomyelitis  
M86.00 Acute haematogenous osteomyelitis (Multiple sites)  
M86.01 Acute haematogenous osteomyelitis (Shoulder region)  
M86.02 Acute haematogenous osteomyelitis (Upper arm)  
M86.03 Acute haematogenous osteomyelitis (Forearm)  
M86.04 Acute haematogenous osteomyelitis (Hand)  
M86.05 Acute haematogenous osteomyelitis (Pelvic region and thigh)  
M86.06 Acute haematogenous osteomyelitis (Lower leg)  
M86.07 Acute haematogenous osteomyelitis (Ankle and foot)  
M86.08 Acute haematogenous osteomyelitis (Other)  
M86.09 Acute haematogenous osteomyelitis (Site unspecified)  
M86.1 Other acute osteomyelitis  
M86.10 Other acute osteomyelitis (Multiple sites)  
M86.11 Other acute osteomyelitis (Shoulder region)  
M86.12 Other acute osteomyelitis (Upper arm)  
M86.13 Other acute osteomyelitis (Forearm)

M86.14 Other acute osteomyelitis (Hand)  
M86.15 Other acute osteomyelitis (Pelvic region and thigh)  
M86.16 Other acute osteomyelitis (Lower leg)  
M86.17 Other acute osteomyelitis (Ankle and foot)  
M86.18 Other acute osteomyelitis (Other)  
M86.19 Other acute osteomyelitis (Site unspecified)  
M86.2 Subacute osteomyelitis  
M86.20 Subacute osteomyelitis (Multiple sites)  
M86.21 Subacute osteomyelitis (Shoulder region)  
M86.22 Subacute osteomyelitis (Upper arm)  
M86.23 Subacute osteomyelitis (Forearm)  
M86.24 Subacute osteomyelitis (Hand)  
M86.25 Subacute osteomyelitis (Pelvic region and thigh)  
M86.26 Subacute osteomyelitis (Lower leg)  
M86.27 Subacute osteomyelitis (Ankle and foot)  
M86.28 Subacute osteomyelitis (Other)  
M86.29 Subacute osteomyelitis (Site unspecified)  
M86.3 Chronic multifocal osteomyelitis  
M86.30 Chronic multifocal osteomyelitis (Multiple sites)  
M86.31 Chronic multifocal osteomyelitis (Shoulder region)  
M86.32 Chronic multifocal osteomyelitis (Upper arm)  
M86.33 Chronic multifocal osteomyelitis (Forearm)  
M86.34 Chronic multifocal osteomyelitis (Hand)  
M86.35 Chronic multifocal osteomyelitis (Pelvic region and thigh)  
M86.36 Chronic multifocal osteomyelitis (Lower leg)  
M86.37 Chronic multifocal osteomyelitis (Ankle and foot)  
M86.38 Chronic multifocal osteomyelitis (Other)  
M86.39 Chronic multifocal osteomyelitis (Site unspecified)  
M86.4 Chronic osteomyelitis with draining sinus  
M86.40 Chronic osteomyelitis with draining sinus (Multiple sites)  
M86.41 Chronic osteomyelitis with draining sinus (Shoulder region)  
M86.42 Chronic osteomyelitis with draining sinus (Upper arm)  
M86.43 Chronic osteomyelitis with draining sinus (Forearm)  
M86.44 Chronic osteomyelitis with draining sinus (Hand)  
M86.45 Chronic osteomyelitis with draining sinus (Pelvic region and thigh)  
M86.46 Chronic osteomyelitis with draining sinus (Lower leg)  
M86.47 Chronic osteomyelitis with draining sinus (Ankle and foot)  
M86.48 Chronic osteomyelitis with draining sinus (Other)  
M86.49 Chronic osteomyelitis with draining sinus (Site unspecified)  
M86.5 Other chronic haematogenous osteomyelitis  
M86.50 Other chronic haematogenous osteomyelitis (Multiple sites)  
M86.51 Other chronic haematogenous osteomyelitis (Shoulder region)  
M86.52 Other chronic haematogenous osteomyelitis (Upper arm)

M86.53 Other chronic haematogenous osteomyelitis (Forearm)  
M86.54 Other chronic haematogenous osteomyelitis (Hand)  
M86.55 Other chronic haematogenous osteomyelitis (Pelvic region and thigh)  
M86.56 Other chronic haematogenous osteomyelitis (Lower leg)  
M86.57 Other chronic haematogenous osteomyelitis (Ankle and foot)  
M86.58 Other chronic haematogenous osteomyelitis (Other)  
M86.59 Other chronic haematogenous osteomyelitis (Site unspecified)  
M86.6 Other chronic osteomyelitis  
M86.60 Other chronic osteomyelitis (Multiple sites)  
M86.61 Other chronic osteomyelitis (Shoulder region)  
M86.62 Other chronic osteomyelitis (Upper arm)  
M86.63 Other chronic osteomyelitis (Forearm)  
M86.64 Other chronic osteomyelitis (Hand)  
M86.65 Other chronic osteomyelitis (Pelvic region and thigh)  
M86.66 Other chronic osteomyelitis (Lower leg)  
M86.67 Other chronic osteomyelitis (Ankle and foot)  
M86.68 Other chronic osteomyelitis (Other)  
M89.6 Osteopathy after poliomyelitis  
M89.60 Osteopathy after poliomyelitis (Multiple sites)  
M89.61 Osteopathy after poliomyelitis (Shoulder region)  
M89.62 Osteopathy after poliomyelitis (Upper arm)  
M89.63 Osteopathy after poliomyelitis (Forearm)  
M89.64 Osteopathy after poliomyelitis (Hand)  
M89.65 Osteopathy after poliomyelitis (Pelvic region and thigh)  
M89.66 Osteopathy after poliomyelitis (Lower leg)  
M89.67 Osteopathy after poliomyelitis (Ankle and foot)  
M89.68 Osteopathy after poliomyelitis (Other)  
M89.69 Osteopathy after poliomyelitis (Site unspecified)  
N08.0 Glomerular disorders in infectious and parasitic diseases classified elsewhere  
N15.1 Renal and perinephric abscess  
N16.0 Renal tubulo-interstitial disorders in infectious and parasitic diseases classified elsewhere  
N22.0 Calculus of urinary tract in schistosomiasis [bilharziasis]  
Other disorders of kidney and ureter in infectious and parasitic diseases classified elsewhere  
N29.1  
N33.0 Tuberculous cystitis  
N34.0 Urethral abscess  
N35.1 Postinfective urethral stricture, not elsewhere classified  
N39.0 Urinary tract infection, site not specified  
N41.2 Abscess of prostate  
N45 Orchitis and epididymitis  
N45.0 Orchitis, epididymitis and epididymo-orchitis with abscess  
N45.9 Orchitis, epididymitis and epididymo-orchitis without abscess  
N73.0 Acute parametritis and pelvic cellulitis  
N73.1 Chronic parametritis and pelvic cellulitis

|       |                                                                                                            |
|-------|------------------------------------------------------------------------------------------------------------|
| N73.2 | Unspecified parametritis and pelvic cellulitis                                                             |
| N73.3 | Female acute pelvic peritonitis                                                                            |
| N73.4 | Female chronic pelvic peritonitis                                                                          |
| N73.5 | Female pelvic peritonitis, unspecified                                                                     |
| N74.0 | Tuberculous infection of cervix uteri                                                                      |
| N74.1 | Female tuberculous pelvic inflammatory disease                                                             |
| N75.1 | Abscess of Bartholin's gland                                                                               |
| N76.4 | Abscess of vulva                                                                                           |
| N77.0 | Ulceration of vulva in infectious and parasitic diseases classified elsewhere                              |
| N77.1 | Vaginitis, vulvitis and vulvovaginitis in infectious and parasitic diseases classified elsewhere           |
| O26.4 | Herpes gestationis                                                                                         |
| O35.3 | Maternal care for (suspected) damage to foetus from viral disease in mother                                |
| O75.3 | Other infection during labour                                                                              |
| O98.0 | Tuberculosis complicating pregnancy, childbirth and the puerperium                                         |
| O98.4 | Viral hepatitis complicating pregnancy, childbirth and the puerperium                                      |
| O98.5 | Other viral diseases complicating pregnancy, childbirth and the puerperium                                 |
| O98.6 | Protozoal diseases complicating pregnancy, childbirth and the puerperium                                   |
| O98.8 | Other maternal infectious and parasitic diseases complicating pregnancy, childbirth and the puerperium     |
| O98.9 | Unspecified maternal infectious or parasitic disease complicating pregnancy, childbirth and the puerperium |
| R57.2 | Septic shock                                                                                               |

---
